# Supplementary material for: Radical cascade cyanomethylation of activated alkenes to construct cyano substituted oxindoles
Source: Royal Society of Chemistry journal article supplement (doi:10.1039/c4cc07667b), 2014-10-10

## *Supporting Information*

### **Radical Cascade Cyanomethylation of Activated Alkenes to Construct Cyano Substituted Oxindoles**

*Juan Li, Zhigang Wang, Ningjie Wu, Ge Gao\* and Jingsong You\**

Key Laboratory of Green Chemistry and Technology of Ministry of Education,  
College of Chemistry, and State Key Laboratory of Biotherapy, West China Medical  
School, Sichuan University, 29 Wangjiang Road, Chengdu 610064, PR China

E-mail: gg2b@scu.edu.cn; jsyou@scu.edu.cn

#### **Table of contents**

|                                                                         |     |
|-------------------------------------------------------------------------|-----|
| <b>I. General Remarks</b> .....                                         | S2  |
| <b>II. Radical trapping experiment</b> .....                            | S2  |
| <b>III. General procedure for the reaction</b> .....                    | S2  |
| <b>IV. Characterization data for products</b> .....                     | S3  |
| <b>V. References</b> .....                                              | S13 |
| <b>VI. Copies of <sup>1</sup>H and <sup>13</sup>C NMR spectra</b> ..... | S14 |

## I. General remarks

Unless otherwise noted, all reagents were obtained from commercial suppliers and used without further purification. CH<sub>3</sub>CN was dried over CaH<sub>2</sub> and stored under N<sub>2</sub> over activated 4Å molecular sieves. Unless otherwise indicated, all reactions were carried out under N<sub>2</sub> atmosphere. All starting materials were prepared according to the literatures and were identified by comparison of their spectral data with those reported in the literatures.<sup>1</sup>

NMR spectra were obtained on a Bruker AV II-400 MHz spectrometer (<sup>1</sup>H NMR at 400 MHz and <sup>13</sup>C NMR at 100 MHz). The <sup>1</sup>H NMR chemical shifts were measured relative to CDCl<sub>3</sub> or DMSO-*d*<sub>6</sub> as the internal reference (CDCl<sub>3</sub>: δ = 7.26 ppm; DMSO-*d*<sub>6</sub>: δ = 2.50 ppm). The <sup>13</sup>C NMR chemical shifts were given using CDCl<sub>3</sub> or DMSO-*d*<sub>6</sub> as the internal standard (CDCl<sub>3</sub>: δ = 77.16 ppm; DMSO-*d*<sub>6</sub>: δ = 39.52 ppm). High-resolution mass spectra (HRMS) were obtained with a Waters-Q-TOF-Premier (ESI). Melting points were determined with XRC-1 and are uncorrected.

## II. Radical trapping experiment

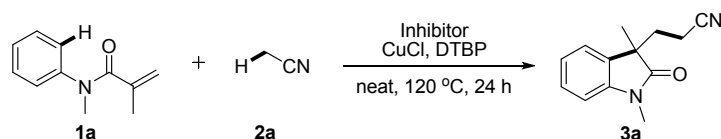

| Entry | Inhibitor | Equivalent | Yield (%) <sup>a,b</sup> |
|-------|-----------|------------|--------------------------|
| 1     | TEMPO     | 1.0 eq.    | 63                       |
| 2     | TEMPO     | 2.0 eq.    | 15                       |
| 3     | TEMPO     | 3.0 eq.    | N. R.                    |
| 4     | BHT       | 0.3 eq.    | 73                       |
| 5     | BHT       | 0.5 eq.    | 19                       |
| 6     | BHT       | 1.0 eq.    | N. R.                    |

<sup>a</sup> Reactions conditions: **1a** (0.25 mmol), CuCl (10 mol%), DTBP (3.0 equiv), inhibitors and CH<sub>3</sub>CN (2.0 mL) at 120 °C under nitrogen atmosphere for 24 h. <sup>b</sup> Isolated yield. N. R. = no reaction.

## III. General procedure for the reaction

To a Schlenk tube were added *N*-arylacrylamide **1** (0.25 mmol), CuCl (10 mol%), DTBP (3.0 equiv) and dry CH<sub>3</sub>CN (2.0 mL). The reaction was stirred at 120 °C under

nitrogen for 24 h. After the reaction was cooled down to ambient temperature, the solvent was removed using rotarvapor and the residue was purified by column chromatography on silica gel (petroleum ether/ethyl acetate = 5/1, v/v) to provide the desired product.

#### IV. Characterization data for products

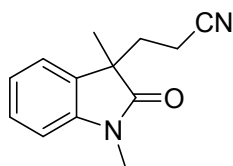

**3-(1,3-Dimethyl-2-oxoindolin-3-yl) propanenitrile (3a):** A white solid (44 mg, 82% yield). M.p.: 70-71 °C. <sup>1</sup>H NMR (400 MHz, CDCl<sub>3</sub>):  $\delta$  = 1.38 (s, 3H), 1.96-2.10 (m, 3H), 2.26-2.32 (m, 1H), 3.21 (s, 3H), 6.87 (d,  $J$  = 7.6 Hz, 1H), 7.10 (td,  $J$  = 7.6 Hz, 0.8 Hz, 1H), 7.18 (dd,  $J$  = 7.6 Hz, 0.8 Hz, 1H), 7.30 (td,  $J$  = 7.6 Hz, 1.2 Hz, 1H) ppm. <sup>13</sup>C NMR (100 MHz, CDCl<sub>3</sub>):  $\delta$  = 13.0, 23.6, 26.4, 33.6, 47.5, 108.6, 118.9, 122.7, 123.2, 128.8, 131.8, 143.3, 179.0 ppm. HRMS (ESI<sup>+</sup>): calcd for C<sub>13</sub>H<sub>14</sub>N<sub>2</sub>ONa [M+Na]<sup>+</sup> 237.1004, found 237.1007.

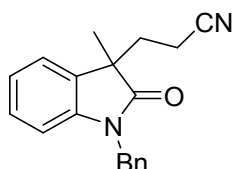

**3-(1-Benzyl-3-methyl-2-oxoindolin-3-yl)propanenitrile (3c):** Colorless oil (58 mg, 80% yield). <sup>1</sup>H NMR (400 MHz, CDCl<sub>3</sub>):  $\delta$  = 1.46 (s, 3H), 1.95-2.16 (m, 3H), 2.34-2.42 (m, 1H), 4.91 (dd,  $J$  = 22.4 Hz, 15.6 Hz, 2H), 6.79 (d,  $J$  = 7.6 Hz, 1H), 7.08 (td,  $J$  = 7.6 Hz, 0.8 Hz, 1H), 7.19-7.23 (m, 2H), 7.27-7.35 (m, 5H) ppm. <sup>13</sup>C NMR (100 MHz, CDCl<sub>3</sub>):  $\delta$  = 13.0, 23.9, 33.6, 43.9, 47.4, 109.6, 119.0, 122.8, 123.2, 127.4, 127.9, 128.7, 129.0, 131.8, 135.8, 142.3, 179.1 ppm. HRMS (ESI<sup>+</sup>): calcd for C<sub>19</sub>H<sub>18</sub>N<sub>2</sub>ONa [M+Na]<sup>+</sup> 313.1317, found 313.1321.

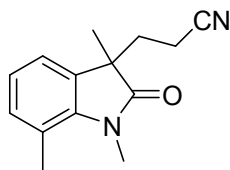

**3-(1,3,7-Trimethyl-2-oxoindolin-3-yl)propanenitrile (3e):** A white solid (51 mg, 89% yield). M.p.: 72-73 °C.  $^1\text{H}$  NMR (400 MHz,  $\text{CDCl}_3$ ):  $\delta$  = 1.37 (s, 3H), 1.95-2.12 (m, 3H), 2.28-2.34 (m, 1H), 2.58 (s, 3H), 3.50 (s, 3H), 6.97-7.05 (m, 3H) ppm.  $^{13}\text{C}$  NMR (100 MHz,  $\text{CDCl}_3$ ):  $\delta$  = 13.0, 19.2, 24.0, 29.8, 33.8, 46.8, 119.0, 120.3, 120.6, 123.1, 132.4, 132.5, 141.0, 179.7 ppm. HRMS (ESI<sup>+</sup>): calcd for  $\text{C}_{14}\text{H}_{16}\text{N}_2\text{ONa}$  [ $\text{M}+\text{Na}$ ]<sup>+</sup> 251.1160, found 251.1161.

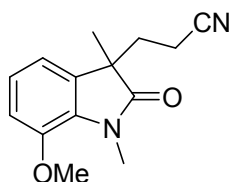

**3-(7-Methoxy-1,3-dimethyl-2-oxoindolin-3-yl)propanenitrile (3f):** Pale yellow oil (47 mg, 77% yield).  $^1\text{H}$  NMR (400 MHz,  $\text{CDCl}_3$ ):  $\delta$  = 1.37 (s, 3H), 1.93-2.12 (m, 3H), 2.26-2.34 (m, 1H), 3.48 (s, 3H), 3.86 (s, 3H), 6.79 (d,  $J$  = 7.2 Hz, 1H), 6.87 (d,  $J$  = 8.0 Hz, 1H), 7.05 (t,  $J$  = 8.0 Hz, 1H) ppm.  $^{13}\text{C}$  NMR (100 MHz,  $\text{CDCl}_3$ ):  $\delta$  = 12.9, 23.8, 29.7, 33.8, 47.5, 56.0, 112.4, 115.2, 119.0, 123.8, 131.0, 133.4, 145.7, 179.2 ppm. HRMS (ESI<sup>+</sup>): calcd for  $\text{C}_{14}\text{H}_{16}\text{N}_2\text{O}_2\text{Na}$  [ $\text{M}+\text{Na}$ ]<sup>+</sup> 267.1109, found 267.1110.

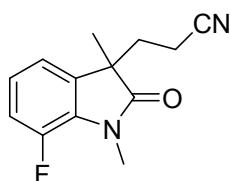

**3-(7-Fluoro-1,3-dimethyl-2-oxoindolin-3-yl)propanenitrile (3g):** A white solid (30 mg, 52% yield). M.p.: 59-61 °C.  $^1\text{H}$  NMR (400 MHz,  $\text{CDCl}_3$ ):  $\delta$  = 1.40 (s, 3H), 1.99-2.15 (m, 3H), 2.28-2.36 (m, 1H), 3.43 (d,  $J$  = 2.4 Hz, 3H), 6.96-7.00 (m, 1H), 7.01-7.06 (m, 2H) ppm.  $^{13}\text{C}$  NMR (100 MHz,  $\text{CDCl}_3$ ):  $\delta$  = 13.0, 23.9, 28.9 (d,  $J$  = 5.0 Hz), 33.6, 47.8 (d,  $J$  = 2.0 Hz), 116.8 (d,  $J$  = 19.0 Hz), 118.6 (d,  $J$  = 4.0 Hz), 118.7, 123.8 (d,  $J$  = 6.0 Hz), 129.9 (d,  $J$  = 8.0 Hz), 134.8 (d,  $J$  = 3.0 Hz), 148.0 (d,  $J$  = 243.0 Hz),

178.6 ppm. HRMS (ESI<sup>+</sup>): calcd for C<sub>13</sub>H<sub>13</sub>FN<sub>2</sub>ONa [M+Na]<sup>+</sup> 255.0910, found 255.0906.

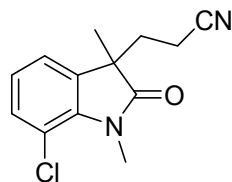

**3-(7-Chloro-1,3-dimethyl-2-oxoindolin-3-yl)propanenitrile (3h):** Pale yellow oil (50 mg, 85% yield). <sup>1</sup>H NMR (400 MHz, CDCl<sub>3</sub>): δ = 1.39 (s, 3H), 1.97-2.14 (m, 3H), 2.29-2.36 (m, 1H), 3.59 (s, 3H), 7.00-7.08 (m, 2H), 7.24 (dd, *J* = 8.0 Hz, 1.2 Hz, 1H) ppm. <sup>13</sup>C NMR (100 MHz, CDCl<sub>3</sub>): δ = 13.0, 24.0, 29.8, 33.7, 47.2, 116.2, 118.7, 121.2, 124.0, 131.2, 134.6, 139.2, 179.2 ppm. HRMS (ESI<sup>+</sup>): calcd for C<sub>13</sub>H<sub>13</sub>ClN<sub>2</sub>ONa [M+Na]<sup>+</sup> 271.0614, found 271.0619.

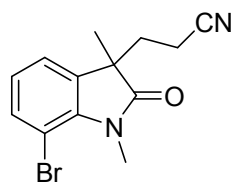

**3-(7-Bromo-1,3-dimethyl-2-oxoindolin-3-yl)propanenitrile (3i):** A pale yellow solid (47 mg, 64% yield). M.p.: 63-66 °C. <sup>1</sup>H NMR (400 MHz, CDCl<sub>3</sub>): δ = 1.39 (s, 3H), 1.97-2.17 (m, 3H), 2.29-2.36 (m, 1H), 3.60 (s, 3H), 6.96 (t, *J* = 8.0 Hz, 1H), 7.11 (dd, *J* = 7.2 Hz, 1.2 Hz, 1H), 7.42 (dd, *J* = 8.0 Hz, 0.8 Hz, 1H) ppm. <sup>13</sup>C NMR (100 MHz, CDCl<sub>3</sub>): δ = 13.0, 24.0, 30.0, 33.8, 47.2, 103.1, 118.7, 121.8, 124.4, 134.5, 135.0, 140.7, 179.4 ppm. HRMS (ESI<sup>+</sup>): calcd for C<sub>13</sub>H<sub>13</sub>BrN<sub>2</sub>ONa [M+Na]<sup>+</sup> 315.0109, found 315.0107.

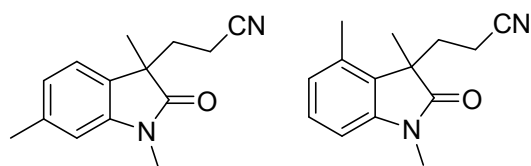

**3j : 3j' = 1:4**

**3-(1,3,6-Trimethyl-2-oxoindolin-3-yl)propanenitrile (3j) and 3-(1,3,4-Trimethyl-**

**2-oxoindolin-3-yl)propanenitrile (3j')**: A mixture of **3j** and **3j'** as colorless oil (47 mg, 82% yield). <sup>1</sup>H NMR (400 MHz, CDCl<sub>3</sub>): δ = 1.37 (s, 0.75H), 1.47 (s, 3H), 1.86-2.03 (m, 2.75H), 2.24-2.31 (m, 1.25H), 2.36-2.42 (m, 4.75H), 3.196 (s, 0.75H), 3.205 (s, 3H), 6.70-6.73 (m, 1.25H), 6.87 (d, *J* = 8.0 Hz, 1H), 6.91 (d, *J* = 7.6 Hz, 0.25H), 7.06 (d, *J* = 7.6 Hz, 0.25H), 7.21 (t, *J* = 8.0 Hz, 1H) ppm. <sup>13</sup>C NMR (100 MHz, CDCl<sub>3</sub>): δ = 13.0, 13.2, 18.3, 21.9, 22.0, 23.7, 26.4, 26.5, 31.6, 33.6, 47.3, 48.5, 106.4, 109.6, 118.8, 119.0, 122.4, 123.6, 125.7, 128.2, 128.6, 128.8, 134.5, 139.0, 143.3, 143.6, 179.0, 179.3 ppm. HRMS (ESI<sup>+</sup>): calcd for C<sub>14</sub>H<sub>16</sub>N<sub>2</sub>O<sub>2</sub>Na [M+Na]<sup>+</sup> 251.1160, found 251.1166.

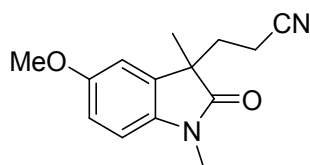

**3-(5-Methoxy-1,3-dimethyl-2-oxoindolin-3-yl)propanenitrile (3k)**: A white solid (47 mg, 77% yield). M.p.: 83-85 °C. <sup>1</sup>H NMR (400 MHz, CDCl<sub>3</sub>): δ = 1.38 (s, 3H), 1.96-2.13 (m, 3H), 2.28-2.35 (m, 1H), 3.19 (s, 3H), 3.81 (s, 3H), 6.76-6.84 (m, 3H) ppm. <sup>13</sup>C NMR (100 MHz, CDCl<sub>3</sub>): δ = 13.0, 23.7, 26.5, 33.6, 47.9, 56.0, 109.0, 110.4, 112.7, 118.9, 133.2, 136.7, 156.5, 178.6 ppm. HRMS (ESI<sup>+</sup>): calcd for C<sub>14</sub>H<sub>16</sub>N<sub>2</sub>O<sub>2</sub>Na [M+Na]<sup>+</sup> 267.1109, found 267.1111.

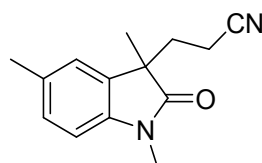

**3-(1,3,5-Trimethyl-2-oxoindolin-3-yl)propanenitrile (3l)**: A white solid (46 mg, 81% yield). M.p.: 90-92 °C. <sup>1</sup>H NMR (400 MHz, CDCl<sub>3</sub>): δ = 1.38 (s, 3H), 1.95-2.10 (m, 3H), 2.29-2.34 (m, 1H), 2.36 (s, 3H), 3.20 (s, 3H), 6.76 (d, *J* = 8.0 Hz, 1H), 7.00 (s, 1H), 7.11 (d, *J* = 8.0 Hz, 1H) ppm. <sup>13</sup>C NMR (100 MHz, CDCl<sub>3</sub>): δ = 13.0, 21.3, 23.7, 26.5, 33.6, 47.6, 108.4, 119.0, 123.6, 129.0, 131.8, 132.8, 140.9, 178.9 ppm. HRMS (ESI<sup>+</sup>): calcd for C<sub>14</sub>H<sub>16</sub>N<sub>2</sub>O<sub>2</sub>Na [M+Na]<sup>+</sup> 251.1160, found 251.1158.

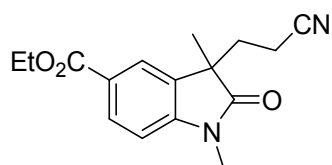

**Ethyl 3-(2-cyanoethyl)-1,3-dimethyl-2-oxindoline-5-carboxylate (3m):** A white solid (36 mg, 50% yield). M.p.: 125 °C. <sup>1</sup>H NMR (400 MHz, CDCl<sub>3</sub>): δ = 1.40-1.43 (m, 6H), 2.02-2.16 (m, 3H), 2.32-2.39 (m, 1H), 3.26 (s, 3H), 4.39 (q, *J* = 7.2 Hz, 2H), 6.92 (d, *J* = 8.4 Hz, 1H), 7.86 (d, *J* = 1.2 Hz, 1H), 8.08 (dd, *J* = 8.0 Hz, 1.2 Hz, 1H) ppm. <sup>13</sup>C NMR (100 MHz, CDCl<sub>3</sub>): δ = 13.0, 14.5, 23.6, 26.7, 33.4, 47.3, 61.2, 108.2, 118.6, 124.0, 125.6, 131.5, 131.8, 147.3, 166.3, 179.4 ppm. HRMS (ESI<sup>+</sup>): calcd for C<sub>16</sub>H<sub>18</sub>N<sub>2</sub>O<sub>3</sub>Na [M+Na]<sup>+</sup> 309.1215, found 309.1217.

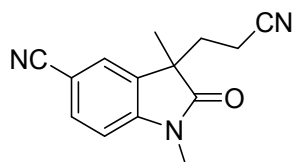

**3-(2-Cyanoethyl)-1,3-dimethyl-2-oxindoline-5-carbonitrile (3n):** A pale yellow solid (38 mg, 63% yield). M.p.: 153-156 °C. <sup>1</sup>H NMR (400 MHz, CDCl<sub>3</sub>): δ = 1.42 (s, 3H), 2.03-2.15 (m, 3H), 2.31-2.37 (m, 1H), 3.26 (s, 3H), 6.96 (d, *J* = 8.0 Hz, 1H), 7.46 (d, *J* = 1.6 Hz, 1H), 7.66 (dd, *J* = 8.0 Hz, 1.2 Hz, 1H) ppm. <sup>13</sup>C NMR (100 MHz, CDCl<sub>3</sub>): δ = 12.9, 23.5, 26.7, 33.1, 47.2, 106.4, 109.1, 118.2, 118.9, 126.2, 133.0, 134.2, 147.1, 178.7 ppm. HRMS (ESI<sup>+</sup>): calcd for C<sub>14</sub>H<sub>13</sub>N<sub>3</sub>O<sub>2</sub>Na [M+Na]<sup>+</sup> 262.0956, found 262.0955.

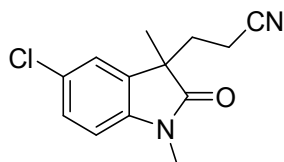

**3-(5-Chloro-1,3-dimethyl-2-oxindolin-3-yl)propanenitrile (3o):** Pale yellow oil (58 mg, 92% yield). <sup>1</sup>H NMR (400 MHz, CDCl<sub>3</sub>): δ = 1.40 (s, 3H), 2.01-2.13 (m, 3H), 2.28-2.36 (m, 1H), 3.21 (s, 3H), 6.81 (d, *J* = 8.0 Hz, 1H), 7.17 (d, *J* = 2.0 Hz, 1H), 7.30 (dd, *J* = 8.0 Hz, 2.0 Hz, 1H) ppm. <sup>13</sup>C NMR (100 MHz, CDCl<sub>3</sub>): δ = 13.0, 23.6, 26.6, 33.4, 47.7, 109.6, 118.6, 123.4, 128.6, 128.8, 133.6, 141.9, 178.5 ppm. HRMS (ESI<sup>+</sup>): calcd for C<sub>13</sub>H<sub>13</sub>ClN<sub>2</sub>O<sub>2</sub>Na [M+Na]<sup>+</sup> 271.0614, found 271.0613.

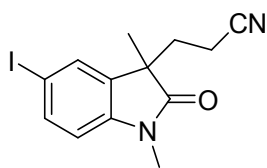

**3-(5-Iodo-1,3-dimethyl-2-oxoindolin-3-yl)propanenitrile (3p):** A pale yellow solid (55 mg, 65% yield). M.p.: 84-86 °C. <sup>1</sup>H NMR (400 MHz, CDCl<sub>3</sub>): δ = 1.39 (s, 3H), 2.00-2.11 (m, 3H), 2.28-2.35 (m, 1H), 3.19 (s, 3H), 6.66 (d, *J* = 8.4 Hz, 1H), 7.47 (d, *J* = 1.6 Hz, 1H), 7.64 (dd, *J* = 8.4 Hz, 1.6 Hz, 1H) ppm. <sup>13</sup>C NMR (100 MHz, CDCl<sub>3</sub>): δ = 13.0, 23.6, 26.5, 33.4, 47.5, 85.7, 110.7, 118.6, 131.6, 134.3, 137.7, 143.0, 178.2 ppm. HRMS (ESI<sup>+</sup>): calcd for C<sub>13</sub>H<sub>13</sub>IN<sub>2</sub>O<sub>2</sub>Na [M+Na]<sup>+</sup> 362.9970, found 362.9976.

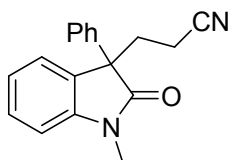

**3-(1-Methyl-2-oxo-3-phenylindolin-3-yl)propanenitrile (4b):** A pale yellow solid (33 mg, 48% yield). M.p.: 152-154 °C. <sup>1</sup>H NMR (400 MHz, CDCl<sub>3</sub>): δ = 2.08-2.22 (m, 2H), 2.46-2.53 (m, 1H), 2.79-2.87 (m, 1H), 3.25 (s, 3H), 6.94 (d, *J* = 7.6 Hz, 1H), 7.17 (t, *J* = 7.2 Hz, 1H), 7.26-7.41 (m, 7H) ppm. <sup>13</sup>C NMR (100 MHz, CDCl<sub>3</sub>): δ = 13.3, 26.7, 33.4, 55.5, 109.0, 118.8, 123.3, 124.9, 126.8, 128.0, 129.0, 129.3, 130.1, 138.5, 143.8, 177.2 ppm. HRMS (ESI<sup>+</sup>): calcd for C<sub>18</sub>H<sub>16</sub>N<sub>2</sub>O<sub>2</sub>Na [M+Na]<sup>+</sup> 299.1160, found 299.1163.

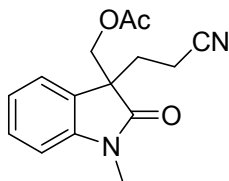

**(3-(2-Cyanoethyl)-1-methyl-2-oxoindolin-3-yl)methyl acetate (4c):** Colorless oil (38 mg, 54% yield). <sup>1</sup>H NMR (400 MHz, CDCl<sub>3</sub>): δ = 1.94 (s, 3H), 1.98-2.21 (m, 3H), 2.36-2.43 (m, 1H), 3.24 (s, 3H), 4.13 (d, *J* = 10.8 Hz, 1H), 4.46 (d, *J* = 10.8 Hz, 1H), 6.90 (d, *J* = 7.6 Hz, 1H), 7.12 (td, *J* = 7.6 Hz, 0.8 Hz, 1H), 7.24 (d, *J* = 7.2 Hz, 1H), 7.36 (td, *J* = 7.6 Hz, 1.2 Hz, 1H) ppm. <sup>13</sup>C NMR (100 MHz, CDCl<sub>3</sub>): δ = 12.6, 20.7,



26.6, 29.1, 51.4, 66.7, 108.8, 118.5, 123.3, 123.8, 127.5, 129.6, 144.0, 170.2, 175.8 ppm. HRMS (ESI<sup>+</sup>): calcd for C<sub>15</sub>H<sub>16</sub>N<sub>2</sub>O<sub>3</sub>Na [M+Na]<sup>+</sup> 295.1059, found 295.1057.

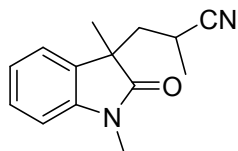

**3-(1,3-Dimethyl-2-oxoindolin-3-yl)-2-methylpropanenitrile (4d):** Colorless oil (54 mg, 94% yield). <sup>1</sup>H NMR (400 MHz, CDCl<sub>3</sub>): δ = 1.18 (d, *J* = 6.4 Hz, 3H), 1.42 (s, 3H), 1.84 (q, *J* = 9.6 Hz, 1H), 2.35-2.42 (m, 2H), 3.23 (s, 3H), 6.90 (d, *J* = 8.0 Hz, 1H), 7.09 (t, *J* = 7.2 Hz, 1H), 7.15 (d, *J* = 6.8 Hz, 1H), 7.32 (td, *J* = 8.0 Hz, 0.8 Hz, 1H) ppm. <sup>13</sup>C NMR (100 MHz, CDCl<sub>3</sub>): δ = 19.3, 21.8, 24.6, 26.5, 41.7, 47.2, 108.8, 121.9, 122.6, 122.8, 128.7, 132.3, 143.6, 179.3 ppm. HRMS (ESI<sup>+</sup>): calcd for C<sub>14</sub>H<sub>16</sub>N<sub>2</sub>ONa [M+Na]<sup>+</sup> 251.1160, found 251.1162.

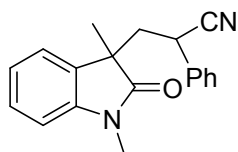

**3-(1,3-Dimethyl-2-oxoindolin-3-yl)-2-phenylpropanenitrile (4e):** Pale yellow oil (66 mg, 91% yield). <sup>1</sup>H NMR (400 MHz, CDCl<sub>3</sub>): δ = 1.45 (s, 3H), 2.14 (dd, *J* = 14.4 Hz, 4.4 Hz, 1H), 2.70 (dd, *J* = 14.4 Hz, 10.8 Hz, 1H), 3.25 (s, 3H), 3.57 (dd, *J* = 10.4 Hz, 4.4 Hz, 1H), 6.88 (d, *J* = 8.0 Hz, 1H), 7.08 (td, *J* = 7.6 Hz, 0.4 Hz, 1H), 7.14-7.16 (m, 3H), 7.24-7.33 (m, 4H) ppm. <sup>13</sup>C NMR (100 MHz, CDCl<sub>3</sub>): δ = 24.8, 26.5, 33.5, 43.5, 47.3, 108.8, 120.0, 122.7, 122.9, 127.3, 128.2, 128.8, 129.2, 132.0, 136.1, 143.6, 179.1 ppm. HRMS (ESI<sup>+</sup>): calcd for C<sub>19</sub>H<sub>18</sub>N<sub>2</sub>ONa [M+Na]<sup>+</sup> 313.1317, found 313.1313.

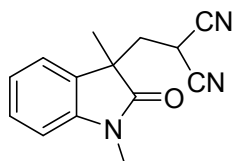

**2-((1,3-Dimethyl-2-oxoindolin-3-yl)methyl)malononitrile (4f):** Brown oil (43 mg, 72% yield). <sup>1</sup>H NMR (400 MHz, CDCl<sub>3</sub>): δ = 1.49 (s, 3H), 2.36 (dd, *J* = 14.0 Hz, 5.2

Hz, 1H), 2.76 (dd,  $J = 14.0$  Hz, 8.8 Hz, 1H), 3.25 (s, 3H), 3.78-3.82 (m, 1H), 6.93 (d,  $J = 8.0$  Hz, 1H), 7.16 (t,  $J = 7.2$  Hz, 1H), 7.23 (d,  $J = 7.2$  Hz, 1H), 7.38 (t,  $J = 7.6$  Hz, 1H) ppm.  $^{13}\text{C}$  NMR (100 MHz,  $\text{CDCl}_3$ ):  $\delta = 18.6, 24.1, 26.7, 37.8, 46.3, 109.3, 112.16, 112.19, 123.0, 123.5, 129.7, 130.2, 143.3, 178.0$  ppm. HRMS (ESI<sup>+</sup>): calcd for  $\text{C}_{14}\text{H}_{13}\text{N}_3\text{ONa}$   $[\text{M}+\text{Na}]^+$  262.0956, found 262.0953.

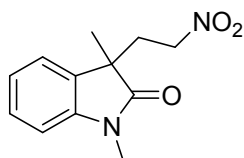

**1,3-Dimethyl-3-(2-nitroethyl)indolin-2-one (5a):** Pale yellow oil (40 mg, 68% yield).  $^1\text{H}$  NMR (400 MHz,  $\text{CDCl}_3$ ):  $\delta = 1.43$  (s, 3H), 2.45-2.52 (m, 1H), 2.59-2.66 (m, 1H), 3.24 (s, 3H), 4.04-4.11 (m, 1H), 4.18-4.25 (m, 1H), 6.88 (d,  $J = 8.0$  Hz, 1H), 7.10 (t,  $J = 7.2$  Hz, 1H), 7.21 (d,  $J = 7.2$  Hz, 1H), 7.32 (td,  $J = 8.0$  Hz, 0.8 Hz, 1H) ppm.  $^{13}\text{C}$  NMR (100 MHz,  $\text{CDCl}_3$ ):  $\delta = 23.7, 26.5, 34.6, 46.3, 71.5, 108.7, 122.8, 123.3, 128.9, 131.8, 143.0, 179.0$  ppm. HRMS (ESI<sup>+</sup>): calcd for  $\text{C}_{12}\text{H}_{14}\text{N}_2\text{O}_3\text{Na}$   $[\text{M}+\text{Na}]^+$  257.0902, found 257.0902.

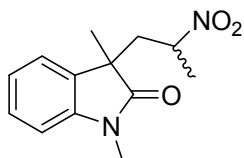

**1,3-Dimethyl-3-(2-nitropropyl)indolin-2-one (5b):** A mixture of isomers of *cis*-**5b** and *trans*-**5b** as yellow oil (57 mg, 92% yield).  $^1\text{H}$  NMR (400 MHz,  $\text{CDCl}_3$ ):  $\delta = 1.31$ -1.39 (m, 12H), 2.02 (dd,  $J = 14.8$  Hz, 3.2 Hz, 1H), 2.29 (dd,  $J = 14.8$  Hz, 4.0 Hz, 1H), 2.73 (dd,  $J = 14.8$  Hz, 8.4 Hz, 1H), 2.82 (dd,  $J = 15.2$  Hz, 8.0 Hz, 1H), 3.22 (d,  $J = 22.8$  Hz, 6H), 4.14-4.18 (m, 1H), 4.44-4.48 (m, 1H), 6.87 (t,  $J = 8.4$  Hz, 2H), 7.04-7.18 (m, 4H), 7.28-7.34 (m, 2H) ppm.  $^{13}\text{C}$  NMR (100 MHz,  $\text{CDCl}_3$ ):  $\delta = 20.9, 21.1, 24.1, 25.2, 26.3, 26.5, 41.7, 42.1, 46.5, 47.2, 80.1, 80.7, 108.5, 108.7, 122.6, 123.0, 123.1, 123.5, 128.7, 128.8, 130.7, 132.4, 143.1, 143.3, 178.8, 179.4$  ppm. HRMS (ESI<sup>+</sup>): calcd for  $\text{C}_{13}\text{H}_{16}\text{N}_2\text{O}_3\text{Na}$   $[\text{M}+\text{Na}]^+$  271.1059, found 271.1064.

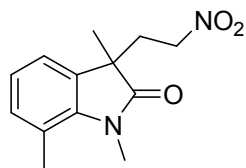

**1,3,7-Trimethyl-3-(2-nitroethyl)indolin-2-one (5c):** Yellow oil (45 mg, 72% yield).  $^1\text{H}$  NMR (400 MHz,  $\text{CDCl}_3$ ):  $\delta$  = 1.40 (s, 3H), 2.39-2.46 (m, 1H), 2.56-2.64 (m, 4H), 3.50 (s, 3H), 4.02-4.09 (m, 1H), 4.16-4.23 (m, 1H), 6.96-7.04 (m, 3H) ppm.  $^{13}\text{C}$  NMR (100 MHz,  $\text{CDCl}_3$ ):  $\delta$  = 19.1, 24.1, 29.8, 35.0, 45.5, 71.5, 120.4, 120.6, 123.2, 132.5, 132.6, 140.8, 179.6 ppm. HRMS (ESI<sup>+</sup>): calcd for  $\text{C}_{13}\text{H}_{16}\text{N}_2\text{O}_3\text{Na}$  [M+Na]<sup>+</sup> 271.1059, found 271.1060.

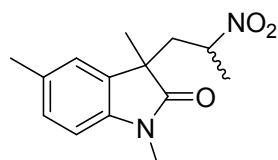

**1,3,5-Trimethyl-3-(2-nitropropyl)indolin-2-one (5d):** A mixture of isomers of *cis*-**5d** and *trans*-**5d** as yellow oil (62 mg, 94% yield).  $^1\text{H}$  NMR (400 MHz,  $\text{CDCl}_3$ ):  $\delta$  = 1.31-1.38 (m, 12H), 1.98 (dd,  $J$  = 15.2 Hz, 3.6 Hz, 1H), 2.29 (dd,  $J$  = 14.8 Hz, 4.8 Hz, 1H), 2.33 (s, 3H), 2.35 (s, 3H), 2.69 (dd,  $J$  = 14.8 Hz, 8.0 Hz, 1H), 2.80 (dd,  $J$  = 15.2 Hz, 8.4 Hz, 1H), 3.17 (s, 3H), 3.22 (s, 3H), 4.12-4.21 (m, 1H), 4.45-4.53 (m, 1H), 6.75 (t,  $J$  = 8.4 Hz, 2H), 6.96 (d,  $J$  = 10.0 Hz, 2H), 7.10 (t,  $J$  = 7.6 Hz, 2H) ppm.  $^{13}\text{C}$  NMR (100 MHz,  $\text{CDCl}_3$ ):  $\delta$  = 20.8, 21.2, 21.26, 21.27, 24.1, 25.3, 26.4, 26.5, 41.8, 42.2, 46.6, 47.2, 80.1, 80.7, 108.2, 108.4, 123.4, 124.2, 128.95, 129.02, 130.9, 132.55, 132.63, 132.7, 140.8, 140.9, 178.8, 179.4 ppm. HRMS (ESI<sup>+</sup>): calcd for  $\text{C}_{14}\text{H}_{18}\text{N}_2\text{O}_3\text{Na}$  [M+Na]<sup>+</sup> 285.1215, found 285.1211.

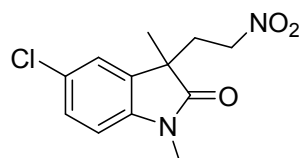

**5-Chloro-1,3-dimethyl-3-(2-nitroethyl)indolin-2-one (5e):** Yellow oil (54 mg, 80% yield).  $^1\text{H}$  NMR (400 MHz,  $\text{CDCl}_3$ ):  $\delta$  = 1.42 (s, 3H), 2.40-2.48 (m, 1H), 2.58-2.65 (m, 1H), 3.21 (s, 3H), 4.09-4.16 (m, 1H), 4.20-4.27 (m, 1H), 6.80 (d,  $J$  = 8.0 Hz, 1H),

7.19 (d,  $J = 2.0$  Hz, 1H), 7.30 (dd,  $J = 8.4$  Hz, 2.0 Hz, 1H) ppm.  $^{13}\text{C}$  NMR (100 MHz,  $\text{CDCl}_3$ ):  $\delta = 23.6, 26.6, 34.5, 46.5, 71.3, 109.6, 123.4, 128.7, 128.9, 133.7, 141.6, 178.4$  ppm. HRMS (ESI<sup>+</sup>): calcd for  $\text{C}_{12}\text{H}_{13}\text{ClN}_2\text{O}_3\text{Na}$   $[\text{M}+\text{Na}]^+$  291.0512, found 291.0510.

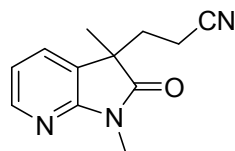

**3-(1,3-Dimethyl-2-oxo-2,3-dihydro-1H-pyrrolo[2,3-b]pyridin-3-yl)propanenitrile**

**(3q):** Orange oil (30 mg, 56% yield).  $^1\text{H}$  NMR (400 MHz,  $\text{CDCl}_3$ ):  $\delta = 1.43$  (s, 3H), 2.04-2.12 (m, 2H), 2.16-2.25 (m, 1H), 2.30-2.38 (m, 1H), 3.31 (s, 3H), 7.02 (dd,  $J = 7.2$  Hz, 5.2 Hz, 1H), 7.45 (dd,  $J = 7.6$  Hz, 1.6 Hz, 1H), 8.24 (dd,  $J = 5.6$  Hz, 1.6 Hz, 1H) ppm.  $^{13}\text{C}$  NMR (100 MHz,  $\text{CDCl}_3$ ):  $\delta = 13.0, 23.1, 25.6, 33.1, 47.2, 118.6, 126.3, 130.4, 147.8, 156.8, 178.7$  ppm. HRMS (ESI<sup>+</sup>): calcd for  $\text{C}_{12}\text{H}_{13}\text{N}_3\text{ONa}$   $[\text{M}+\text{Na}]^+$  238.0956, found 238.0959.

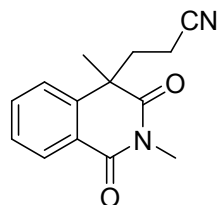

**3-(2,4-Dimethyl-1,3-dioxo-1,2,3,4-tetrahydroisoquinolin-4-yl)propanenitrile (3r):**

Pale yellow oil (28 mg, 46% yield).  $^1\text{H}$  NMR (400 MHz,  $\text{CDCl}_3$ ):  $\delta = 1.65$  (s, 3H), 1.89-2.08 (m, 2H), 2.23-2.30 (m, 1H), 2.73-2.81 (m, 1H), 3.40 (s, 3H), 7.42 (d,  $J = 8.0$  Hz, 1H), 7.49-7.53 (m, 1H), 7.71 (td,  $J = 7.6$  Hz, 1.2 Hz, 1H), 8.29 (dd,  $J = 8.0$  Hz, 1.2 Hz, 1H) ppm.  $^{13}\text{C}$  NMR (100 MHz,  $\text{CDCl}_3$ ):  $\delta = 13.7, 27.5, 30.3, 36.9, 47.2, 118.3, 125.0, 125.2, 128.4, 129.7, 134.7, 141.2, 163.9, 175.2$  ppm. HRMS (ESI<sup>+</sup>): calcd for  $\text{C}_{14}\text{H}_{14}\text{N}_2\text{O}_2\text{Na}$   $[\text{M}+\text{Na}]^+$  265.0953, found 265.0950.

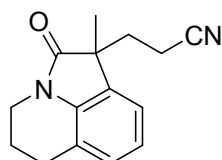

**3-(1-Methyl-2-oxo-2,4,5,6-tetrahydro-1H-pyrrolo[3,2,1-ij]quinolin-1-yl)propanenitrile (3s):** Yellow oil (44 mg, 73% yield). <sup>1</sup>H NMR (400 MHz, CDCl<sub>3</sub>):  $\delta$  = 1.40 (s, 3H), 1.98-2.14 (m, 5H), 2.27-2.34 (m, 1H), 2.80 (t,  $J$  = 6.0 Hz, 2H), 3.66-3.77 (m, 2H), 6.97-7.03 (m, 2H), 7.06 (dt,  $J$  = 6.8 Hz, 0.8 Hz, 1H) ppm. <sup>13</sup>C NMR (100 MHz, CDCl<sub>3</sub>):  $\delta$  = 13.1, 21.3, 23.3, 24.7, 33.4, 39.0, 48.8, 119.0, 120.6, 120.8, 122.6, 127.6, 130.4, 139.1, 177.9 ppm. HRMS (ESI<sup>+</sup>): calcd for C<sub>15</sub>H<sub>16</sub>N<sub>2</sub>ONa [M+Na]<sup>+</sup> 263.1160, found 263.1165.

## V. References

- [1] (a) M. P. Sibi, Z. Ma, K. Itoh, N. Prabakaran and C. P. Jasperse, *Org. Lett.*, 2005, **7**, 2349; (b) A. Pinto, Y. Jia, L. Neuville and J. Zhu, *Chem. Eur. J.*, 2007, **13**, 961; (c) A. J.-L. Ayitou and J. Sivaguru, *Chem. Commun.*, 2011, **47**, 2568; (d) Q.-Q. Zhang, J.-H. Xie, X.-H. Yang, J.-B. Xie and Q.-L. Zhou, *Org. Lett.*, 2012, **14**, 6158.

## VI. Copies of $^1\text{H}$ and $^{13}\text{C}$ NMR spectra

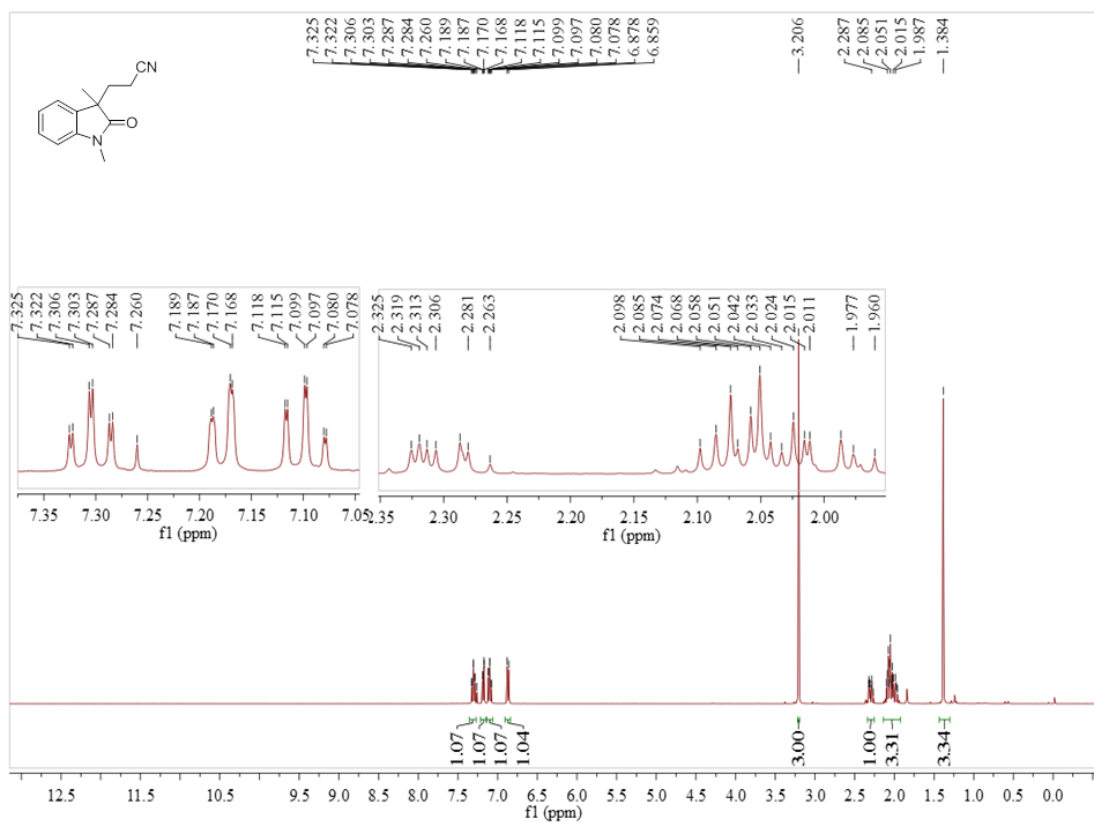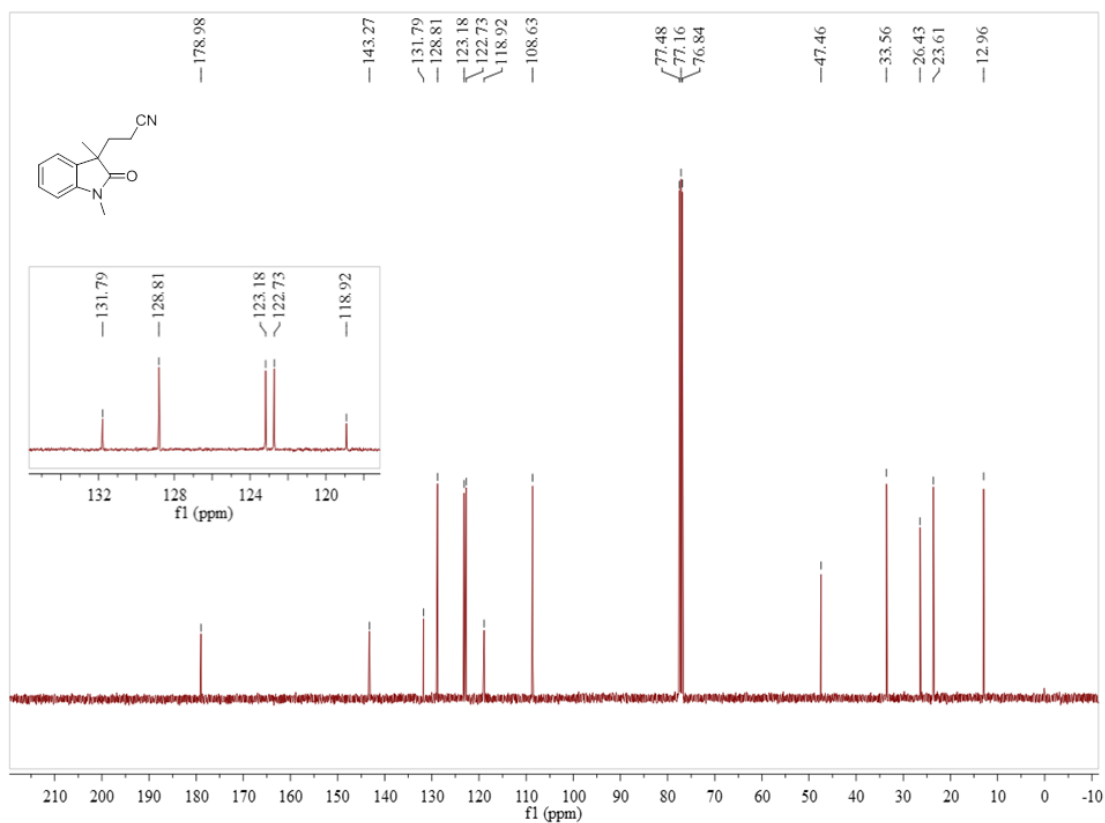

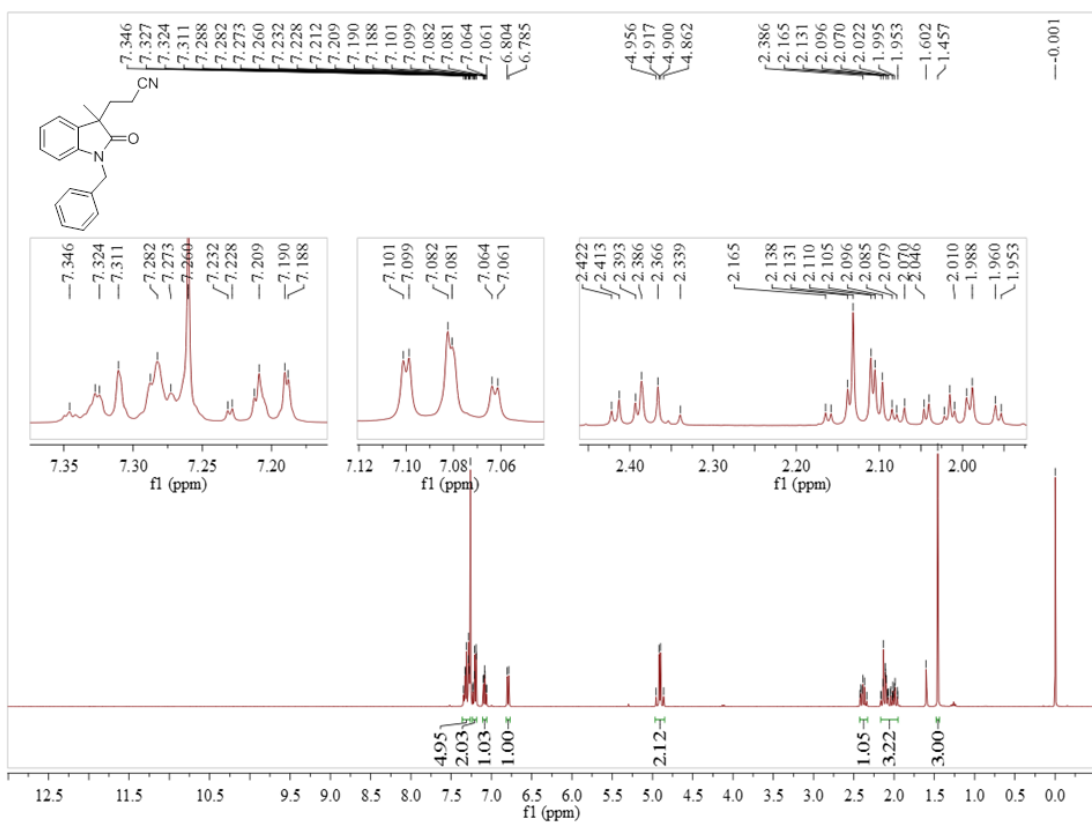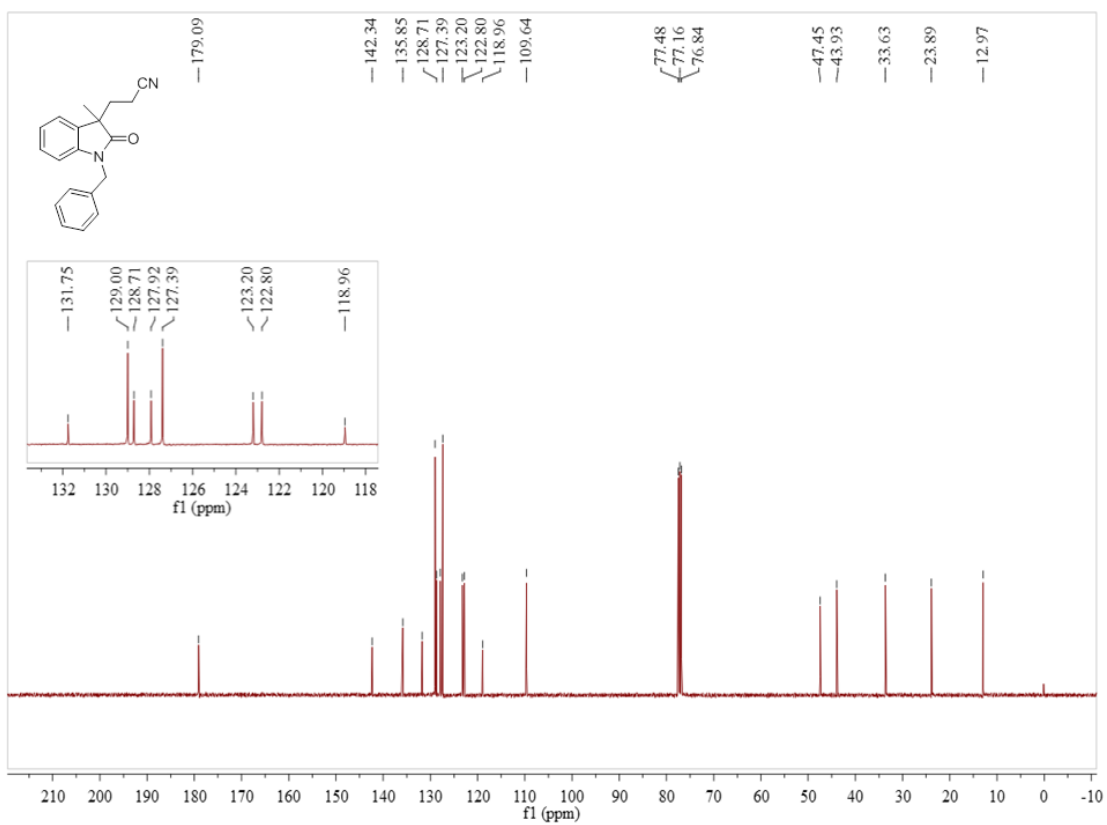

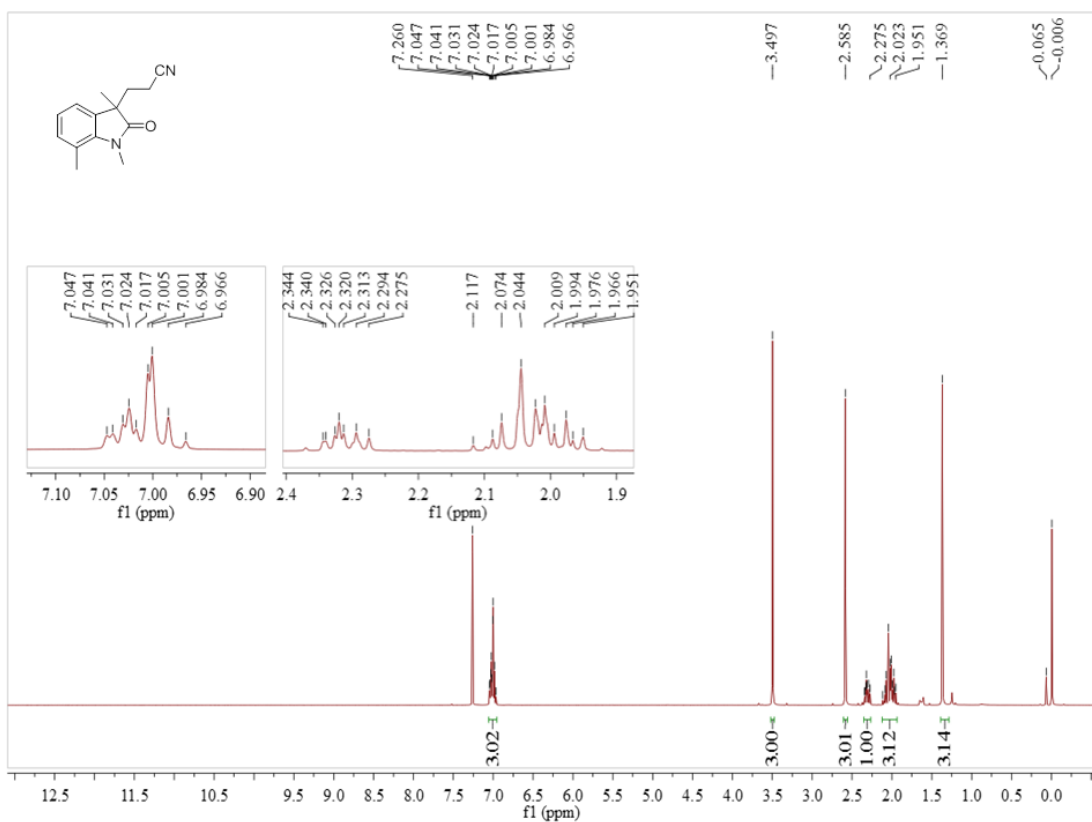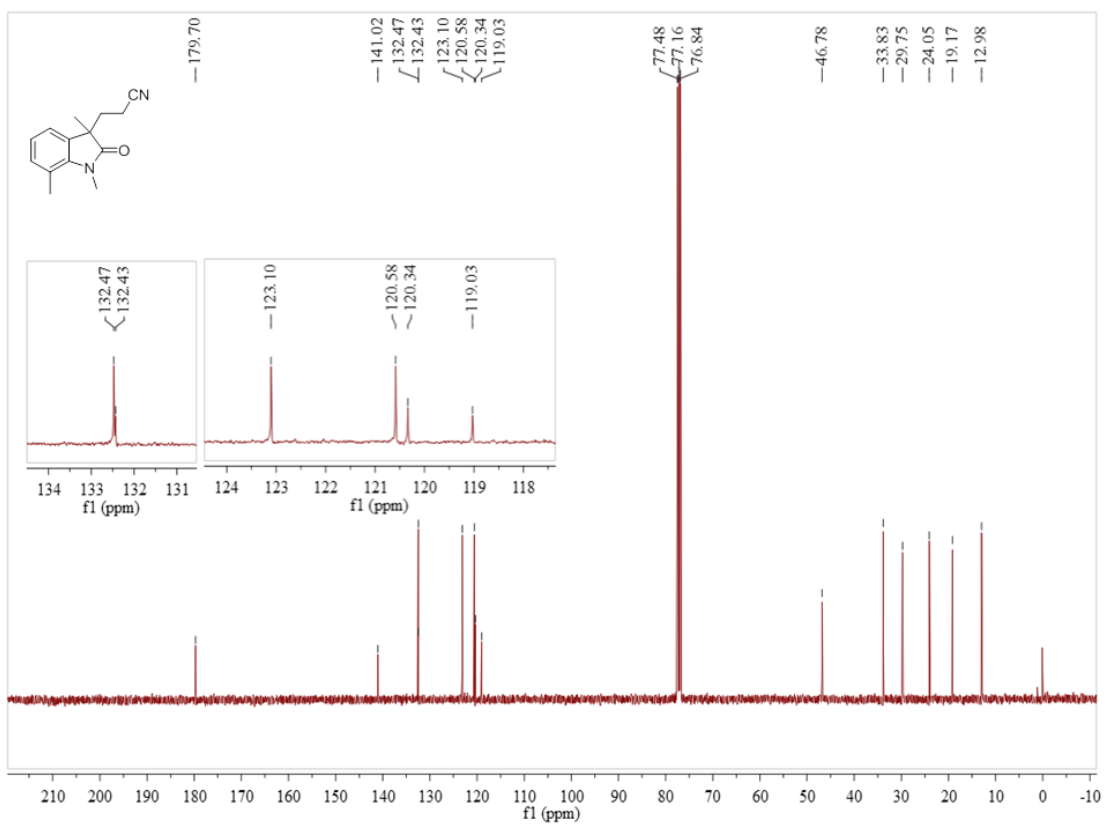



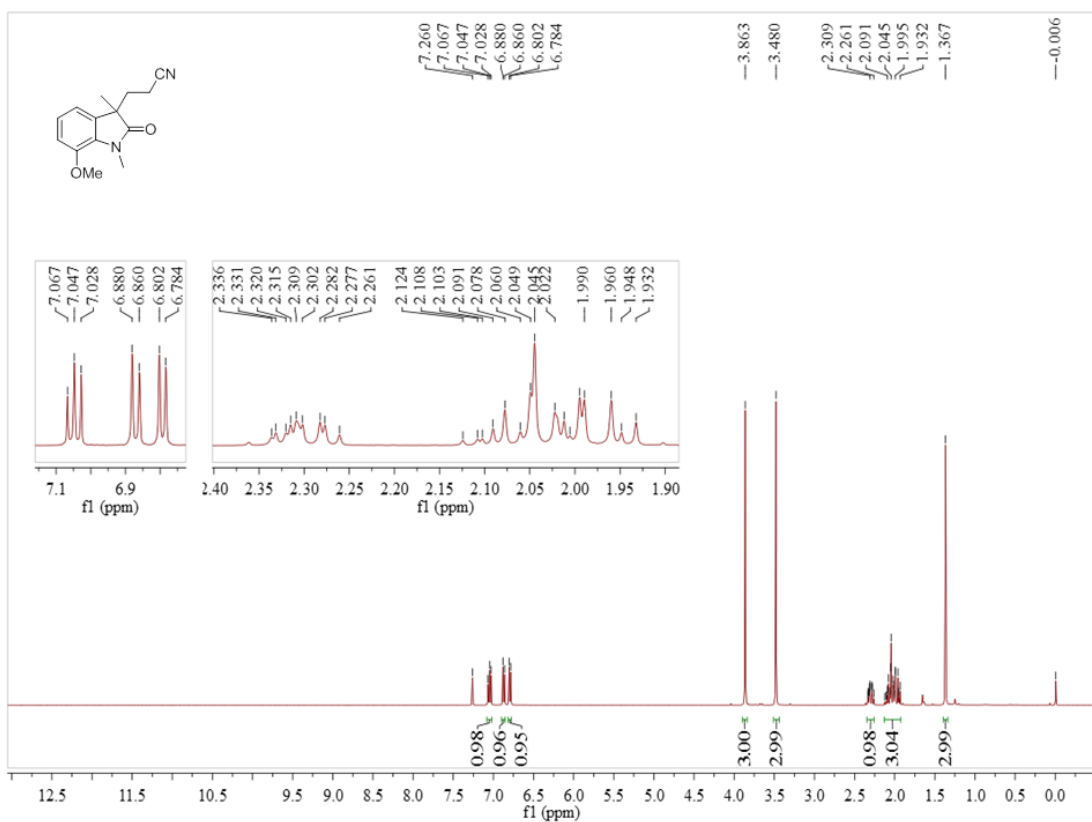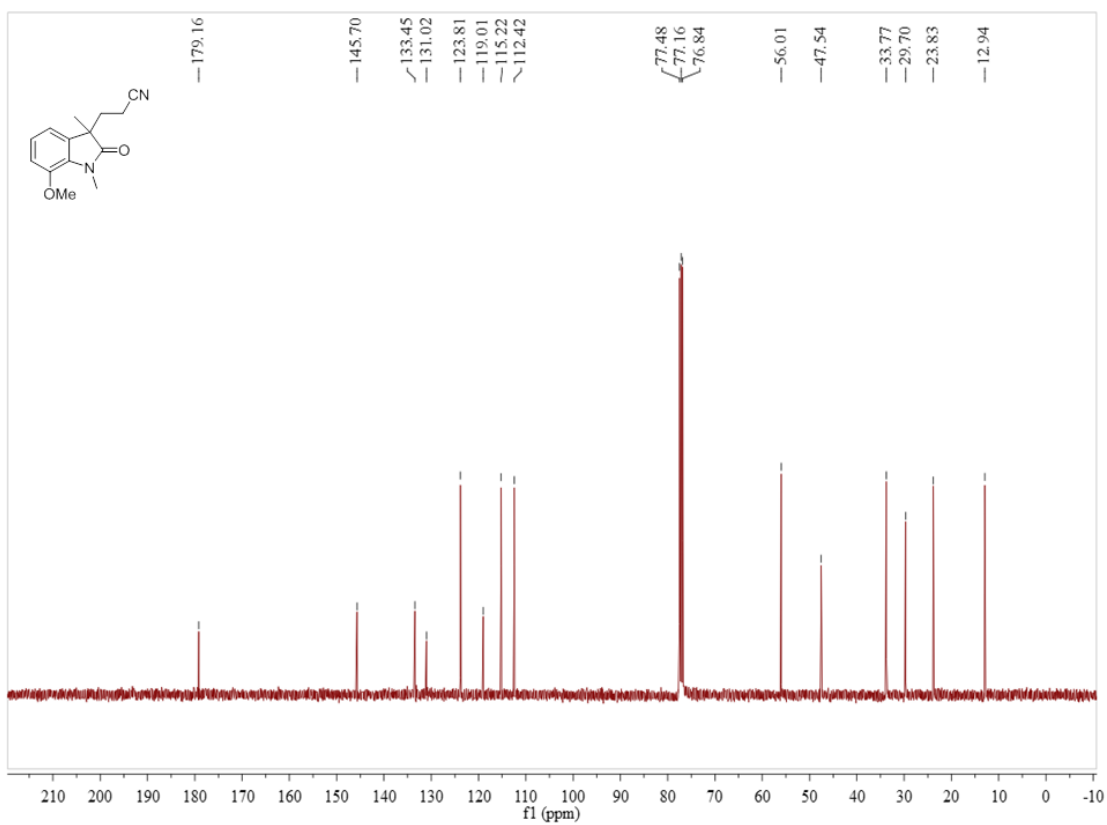

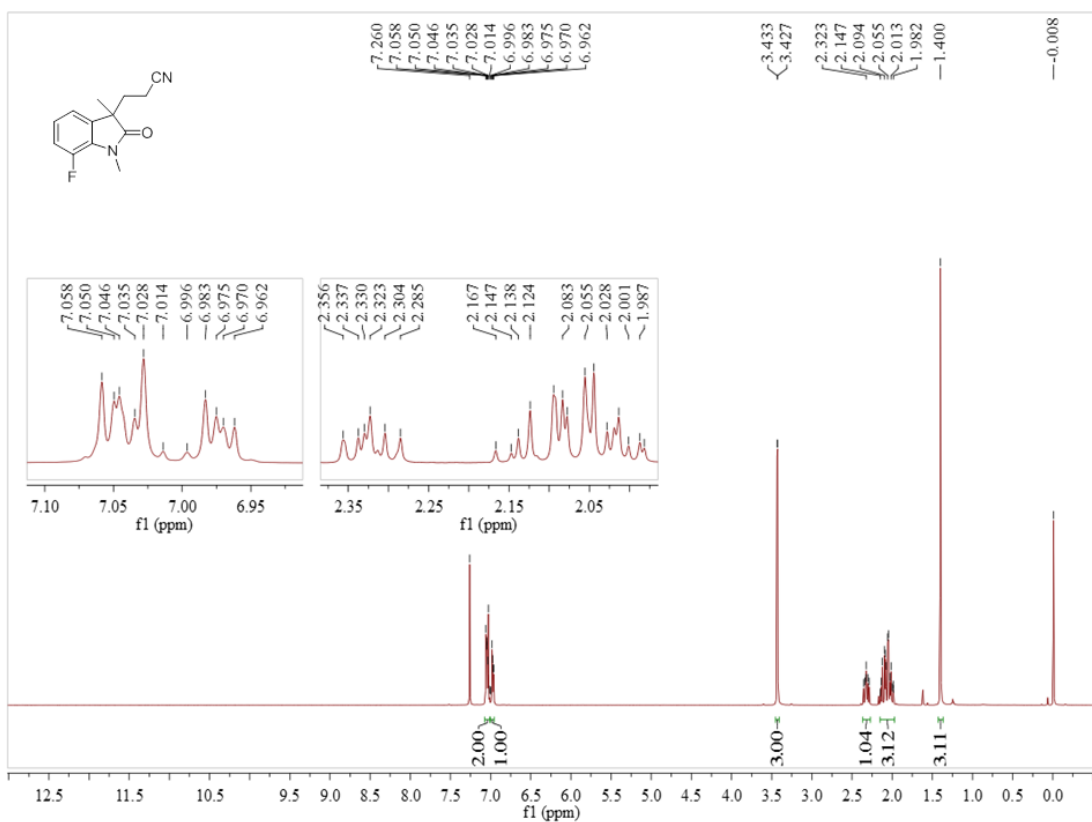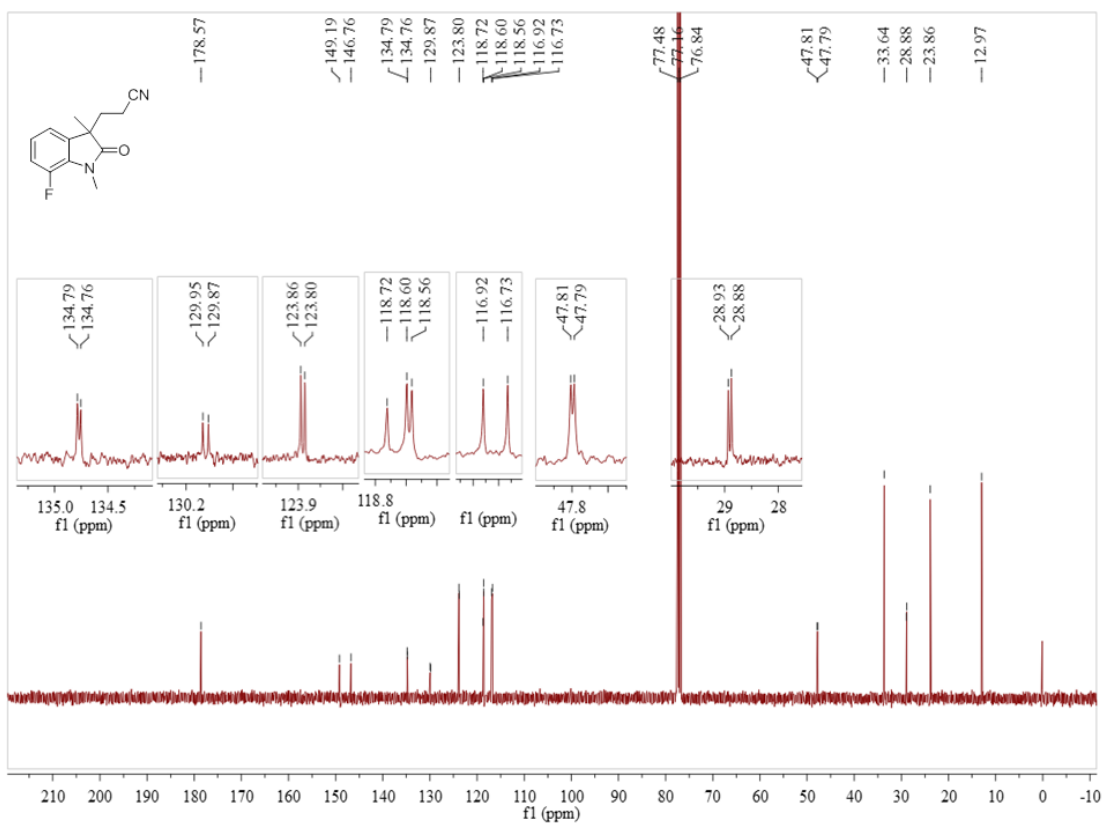

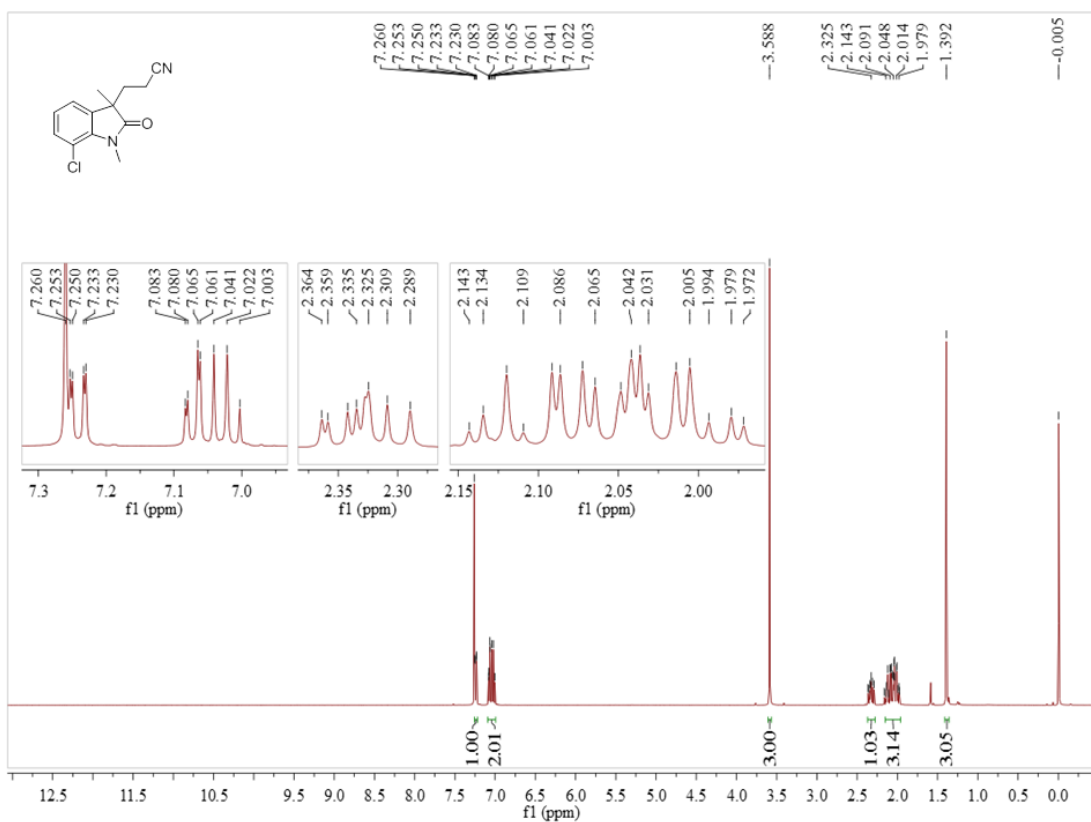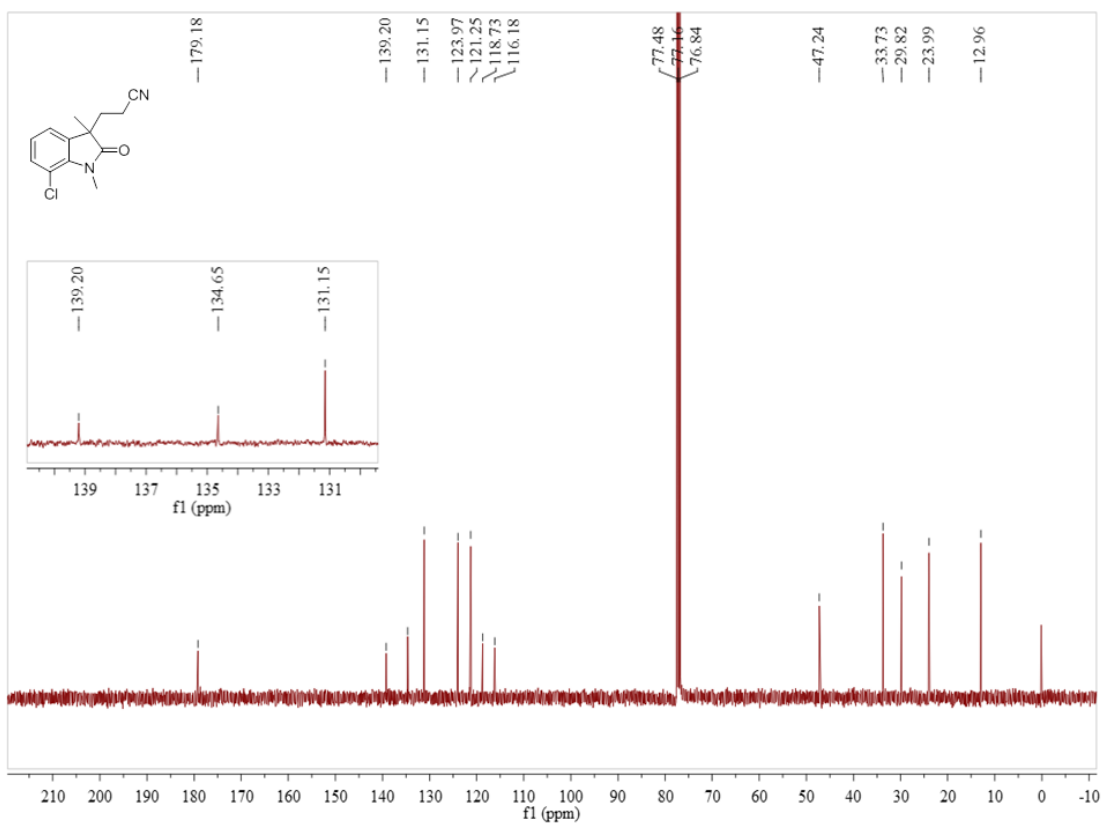

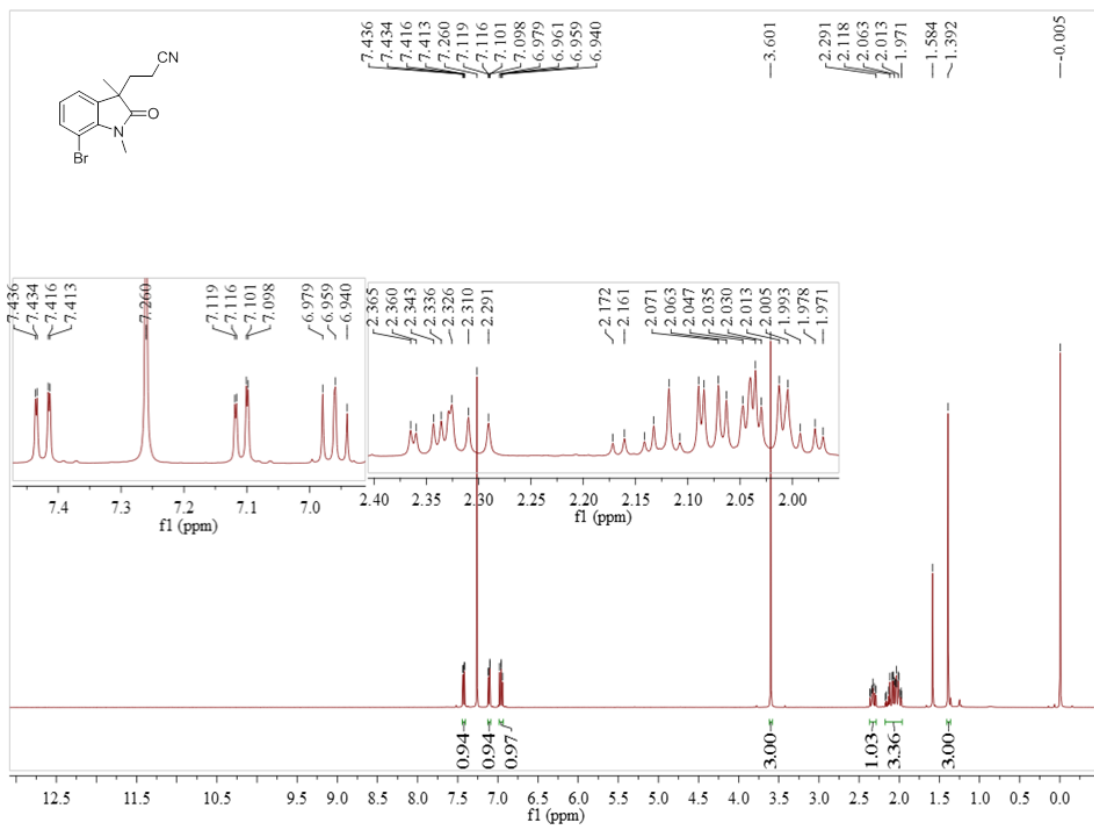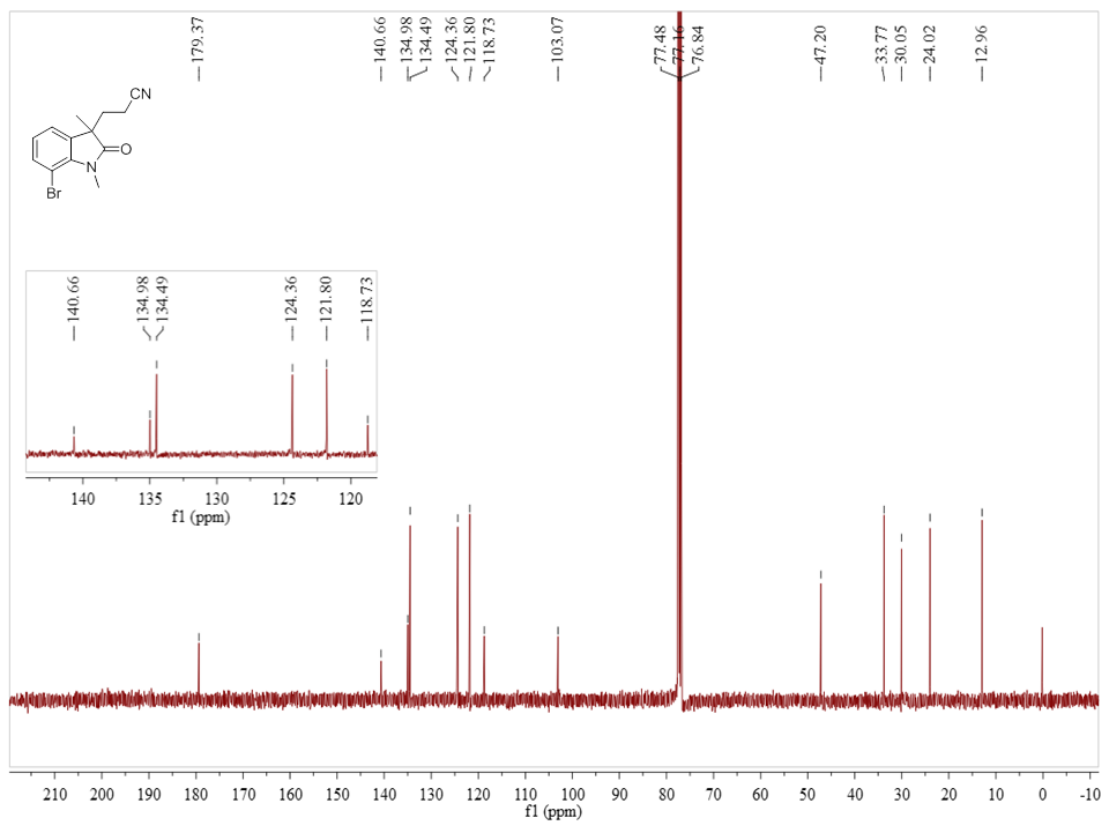

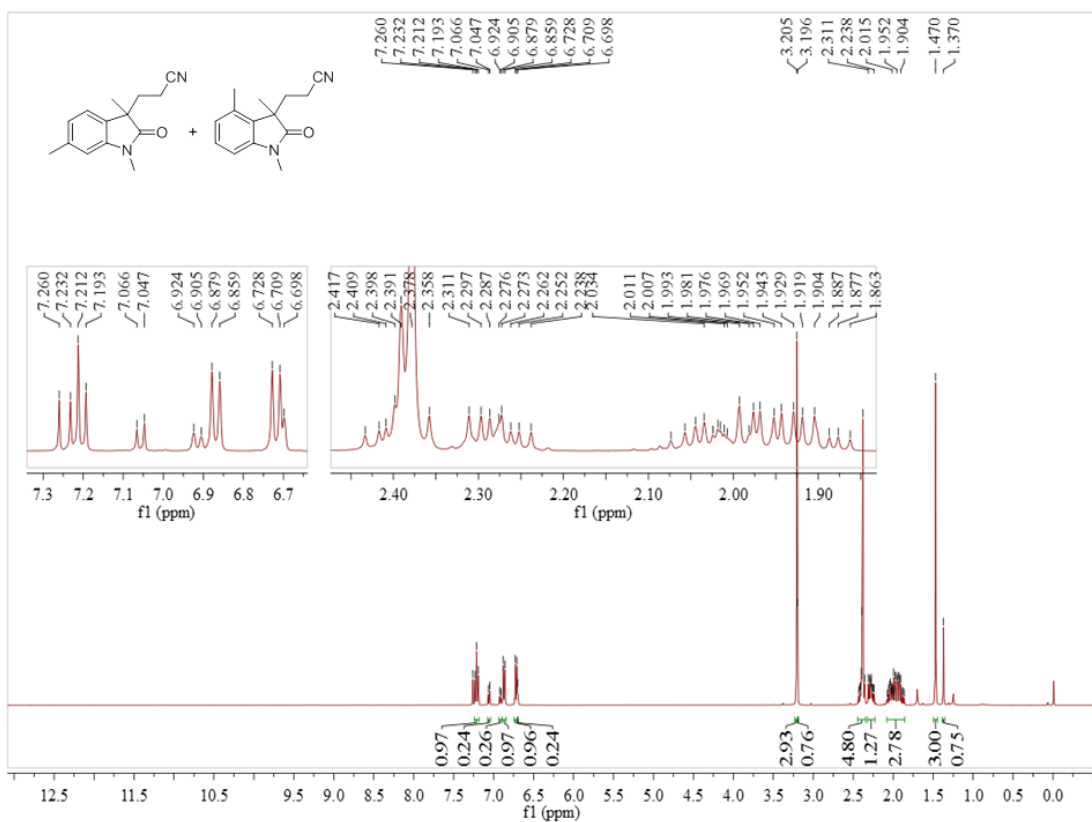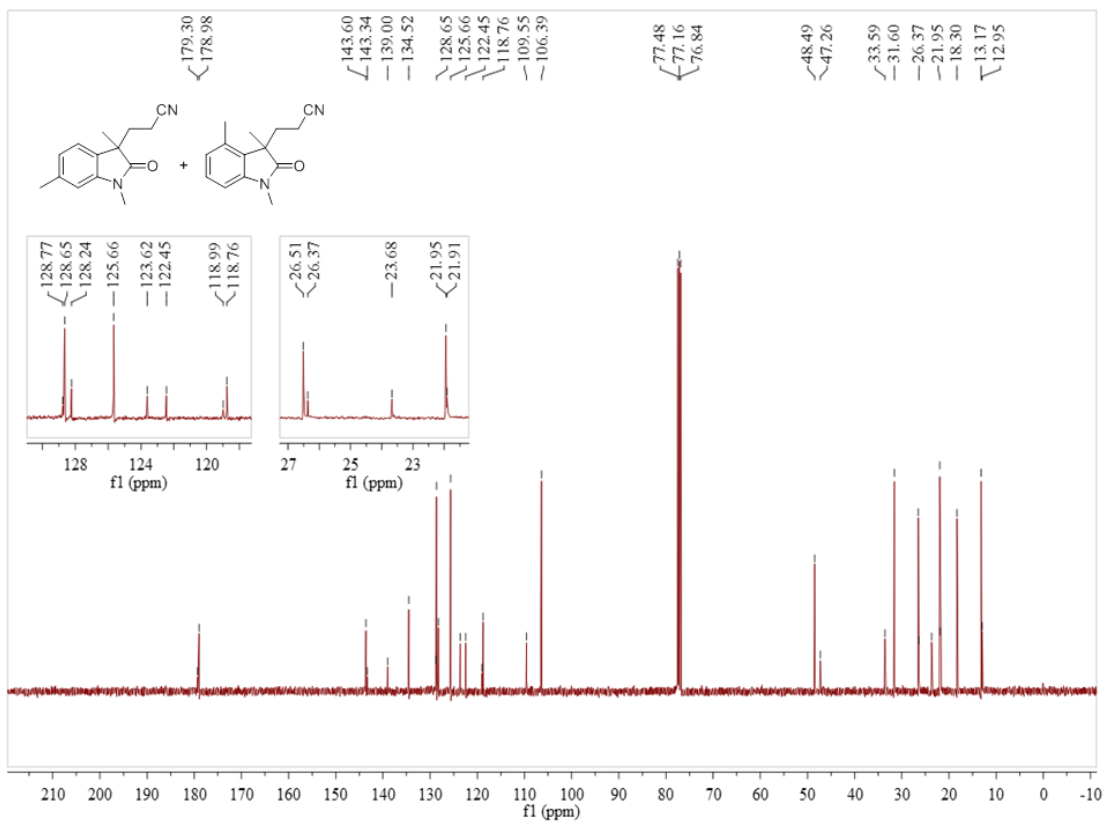

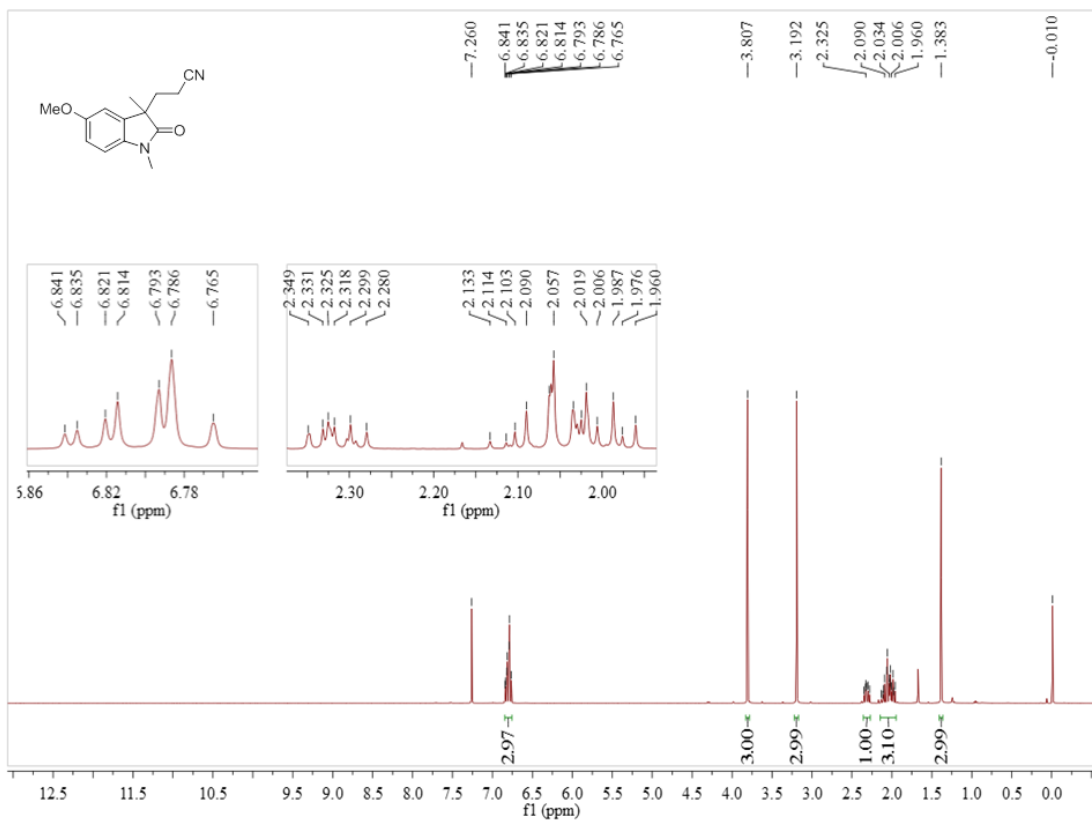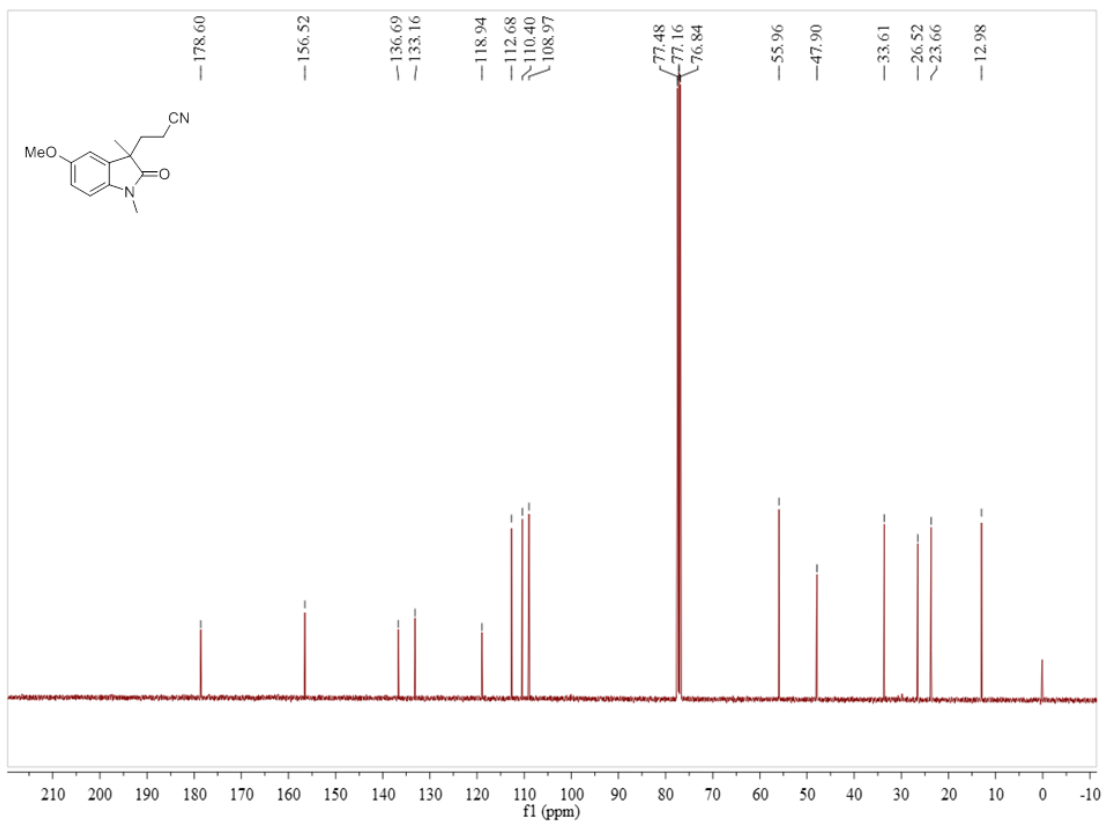

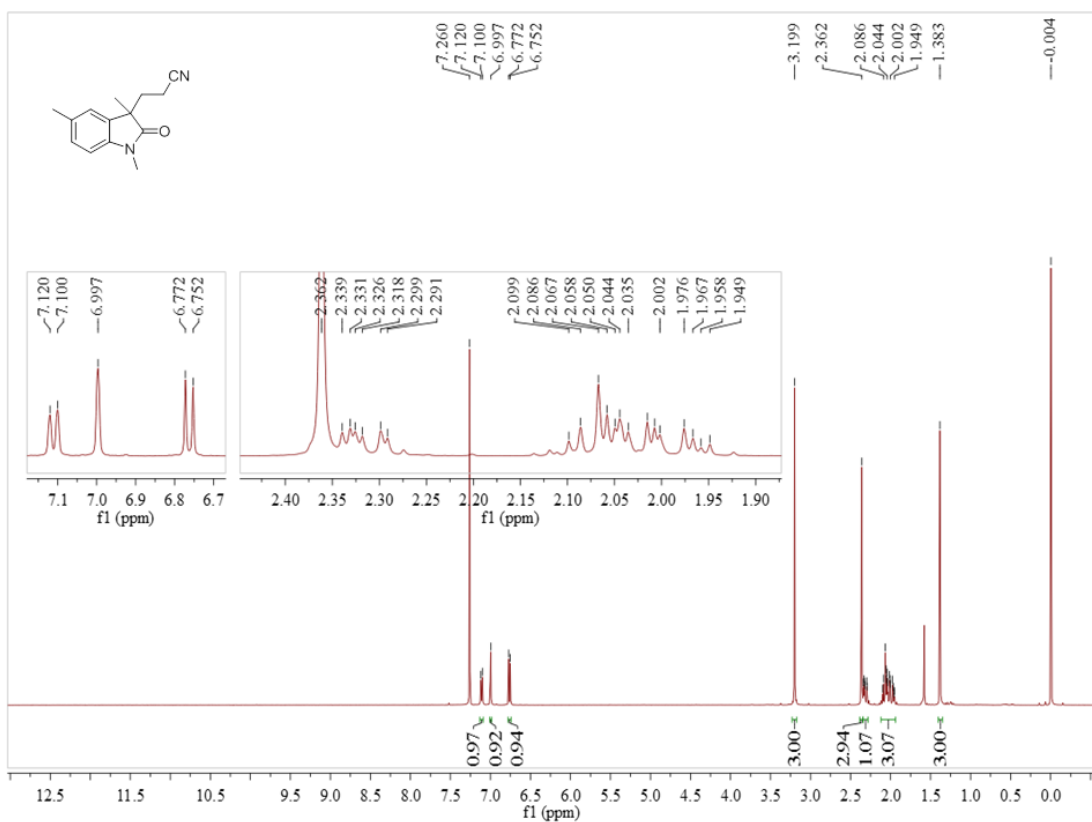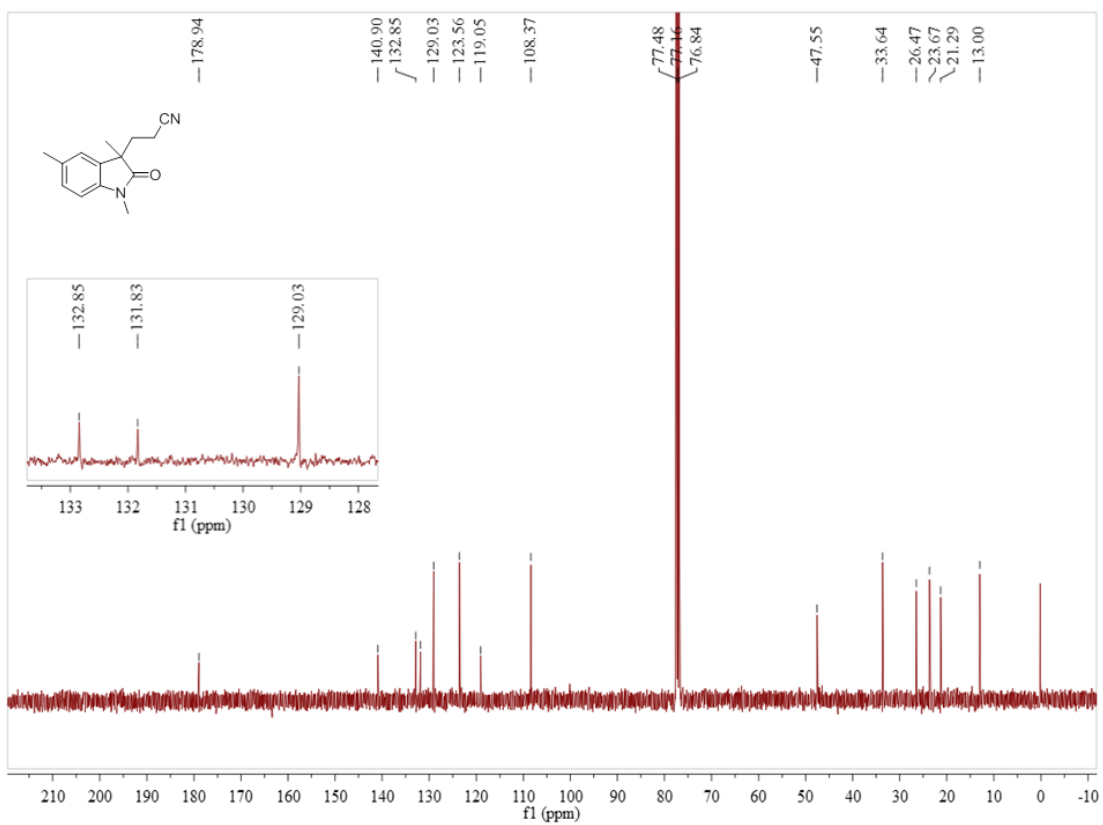

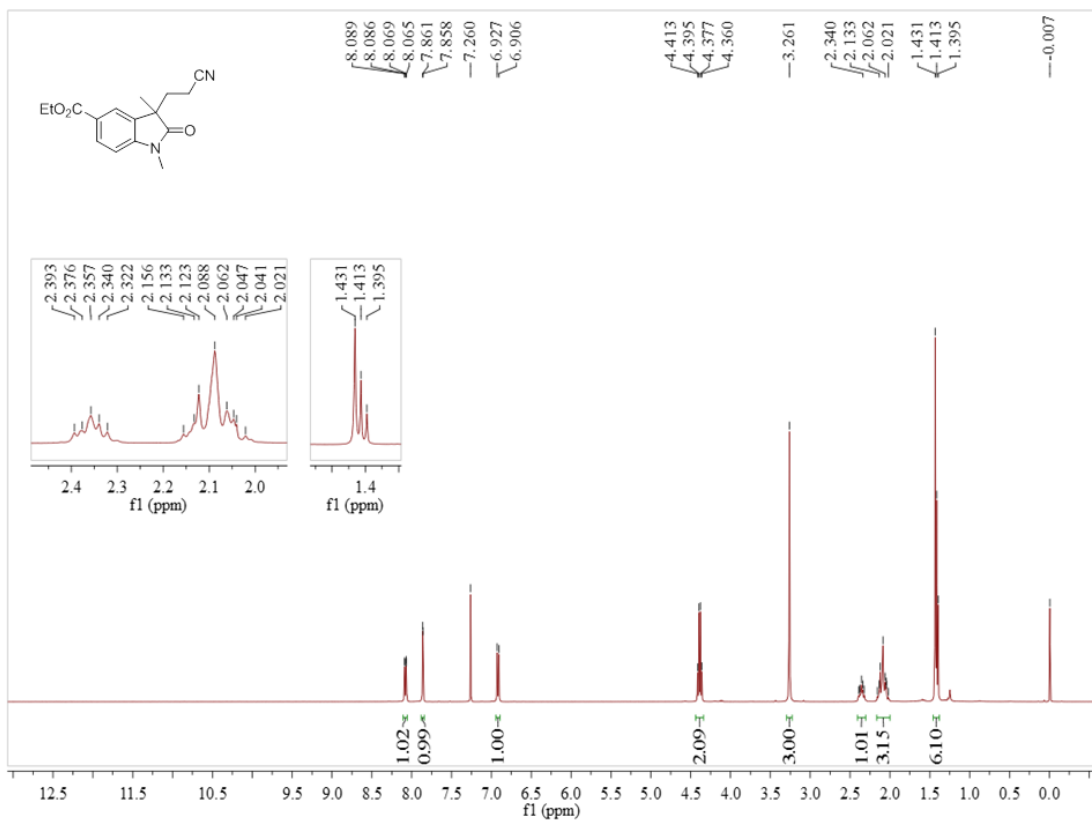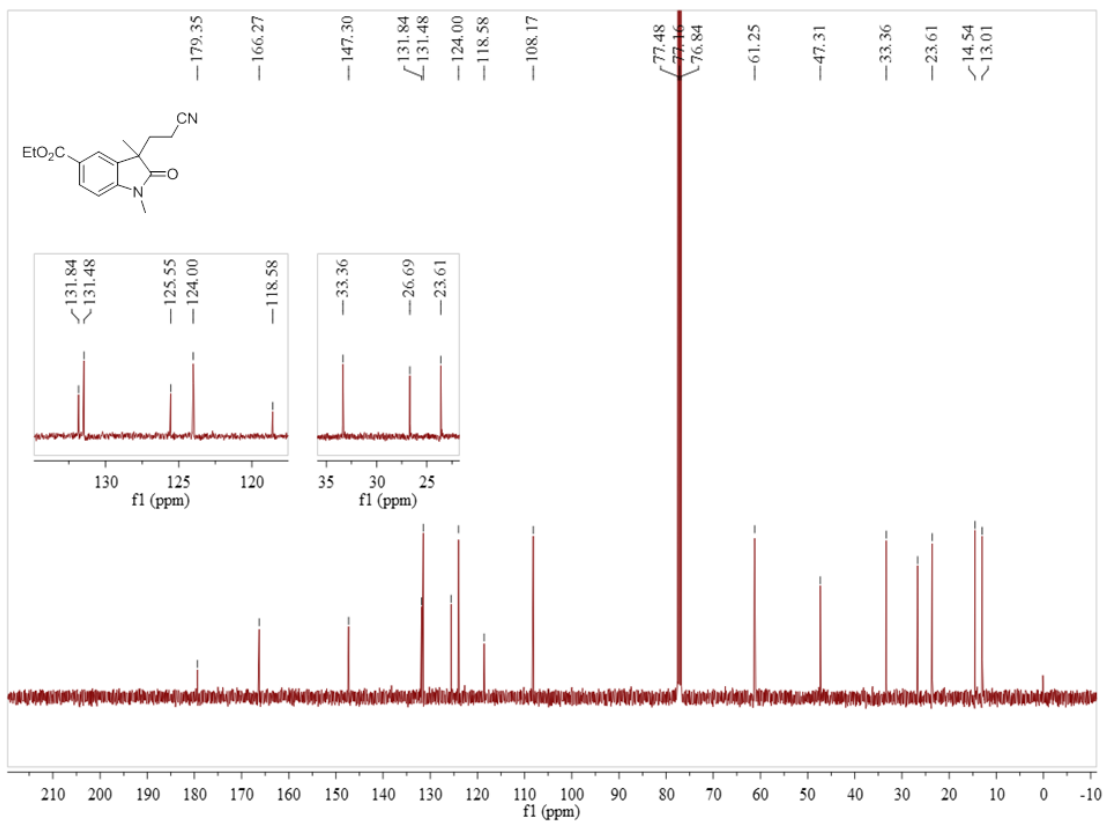



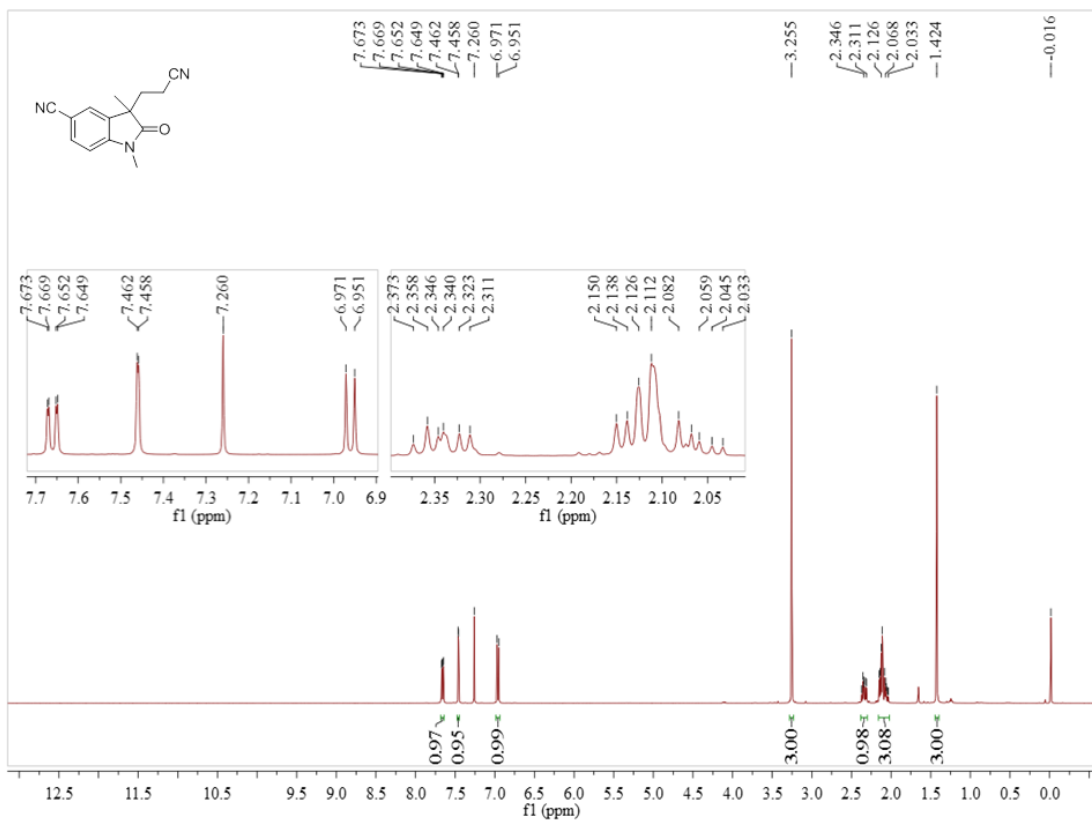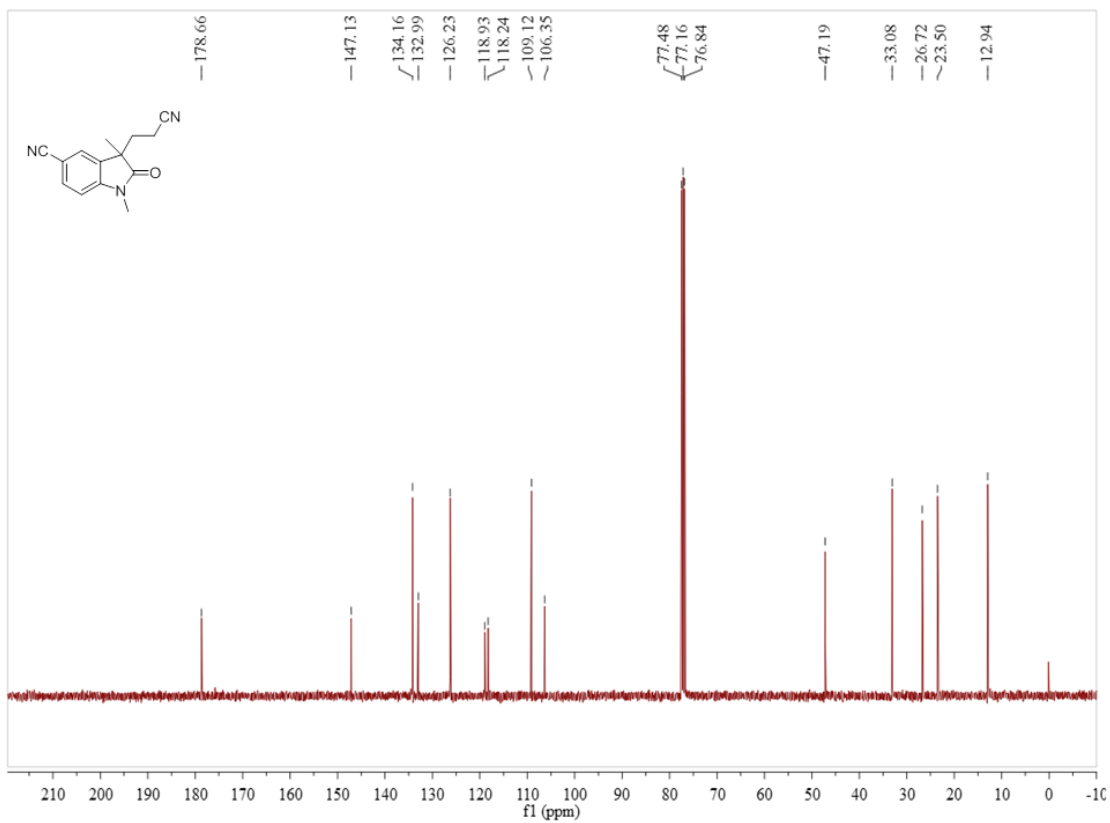

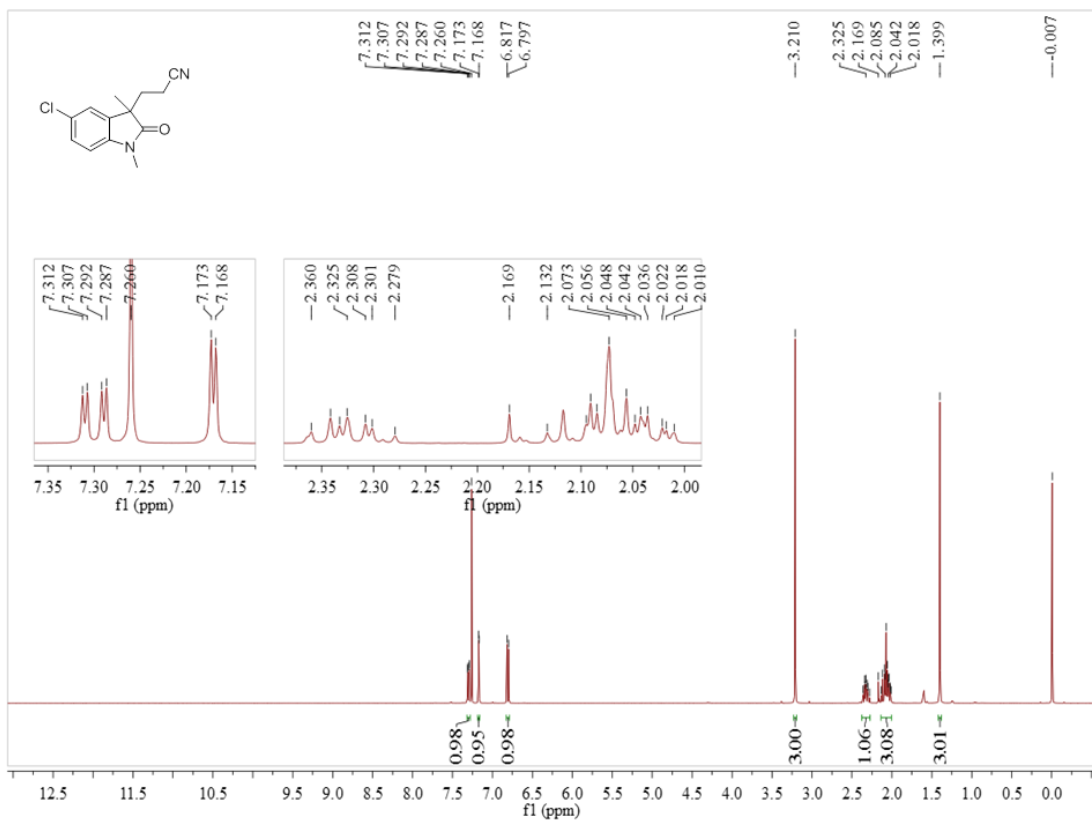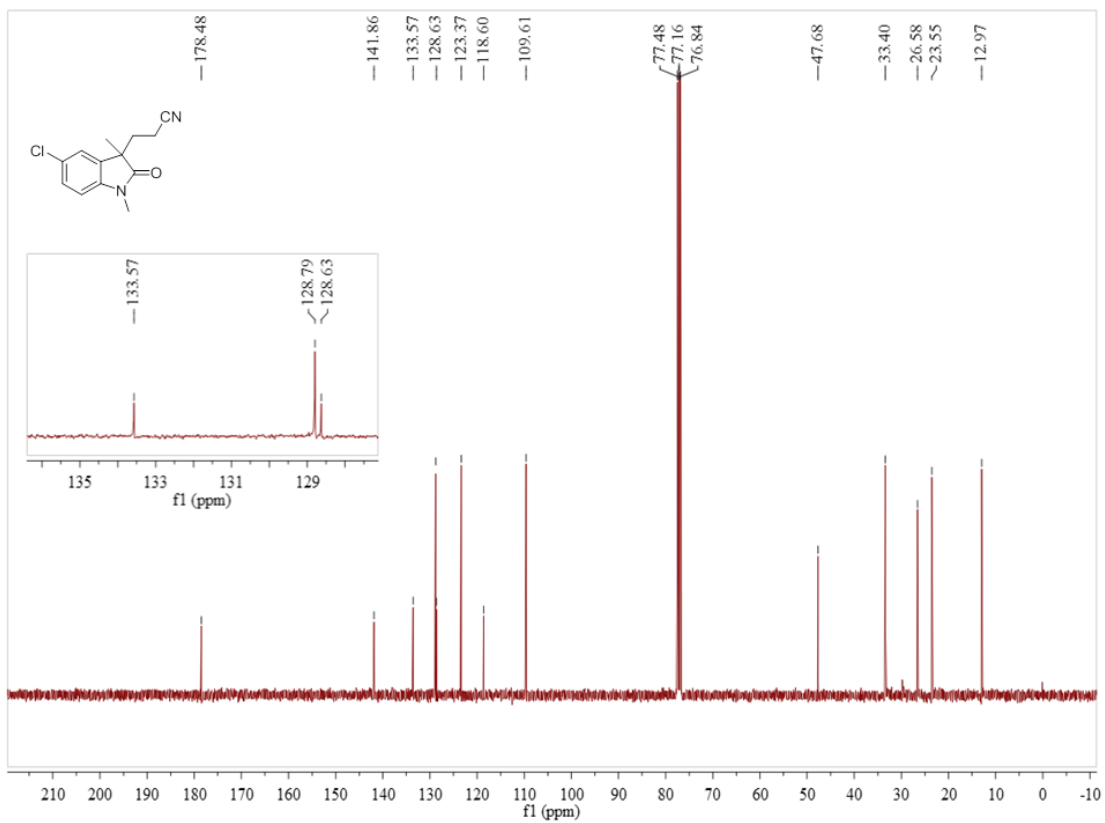

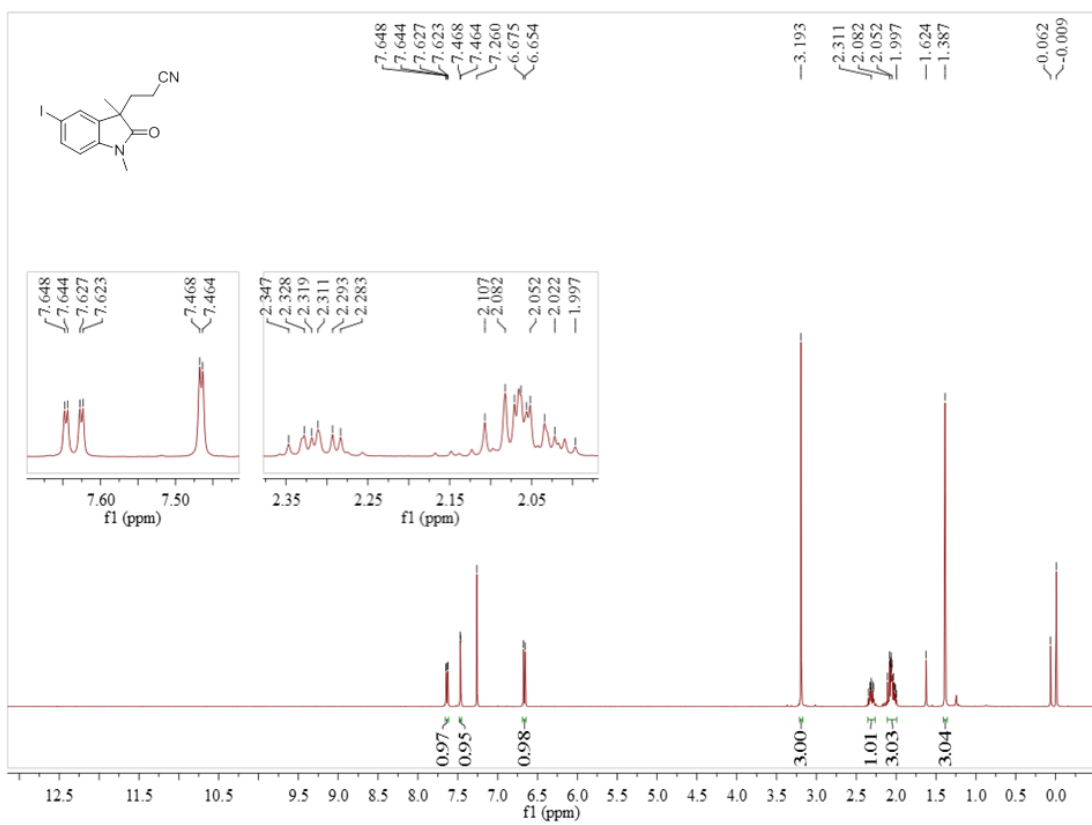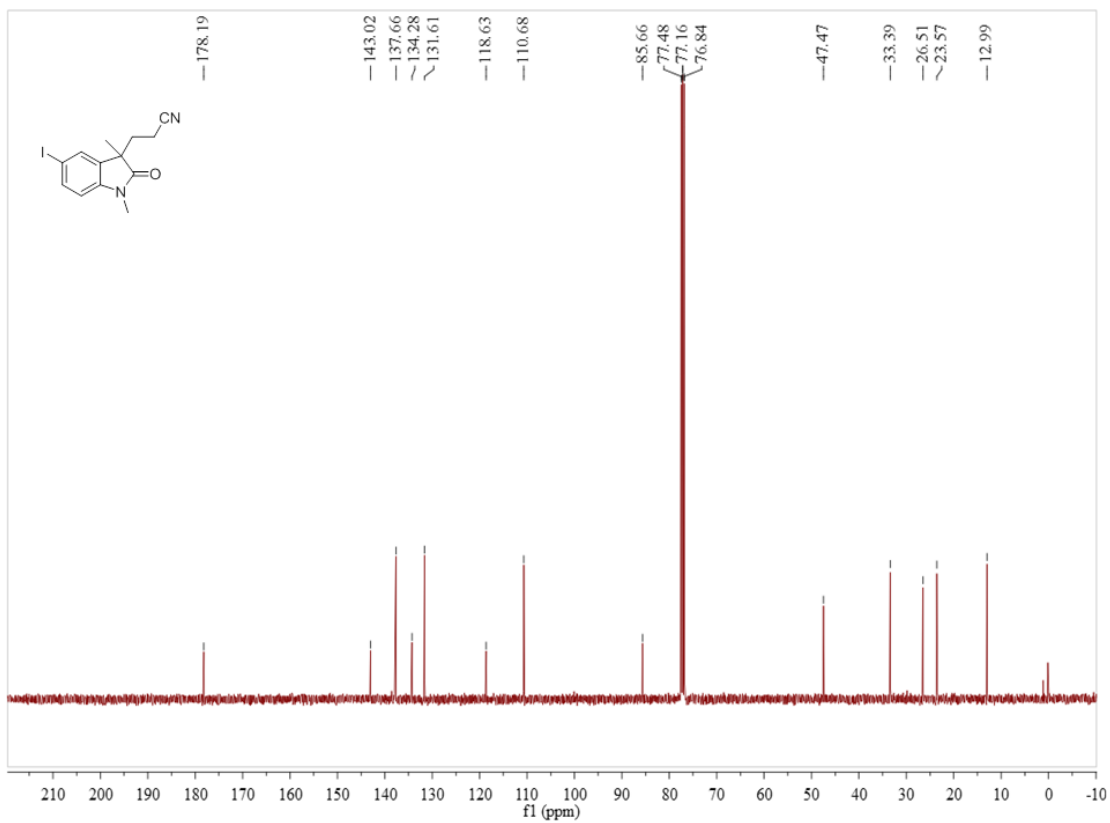

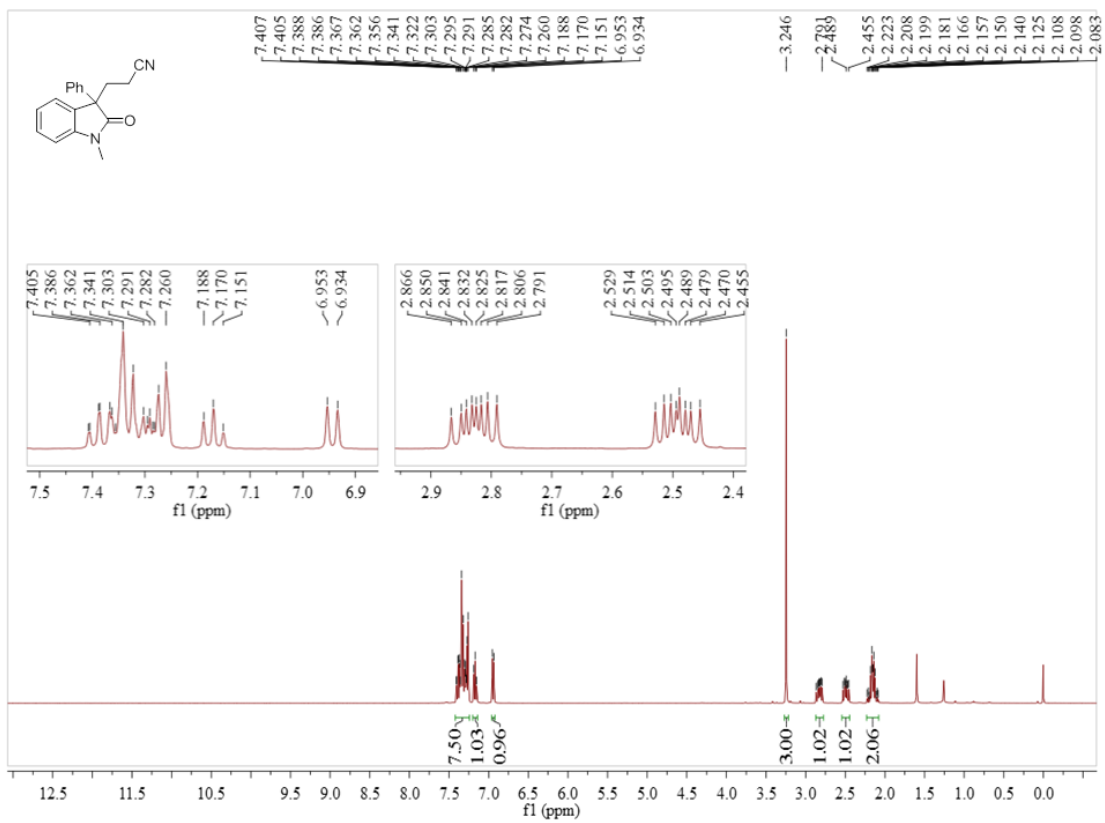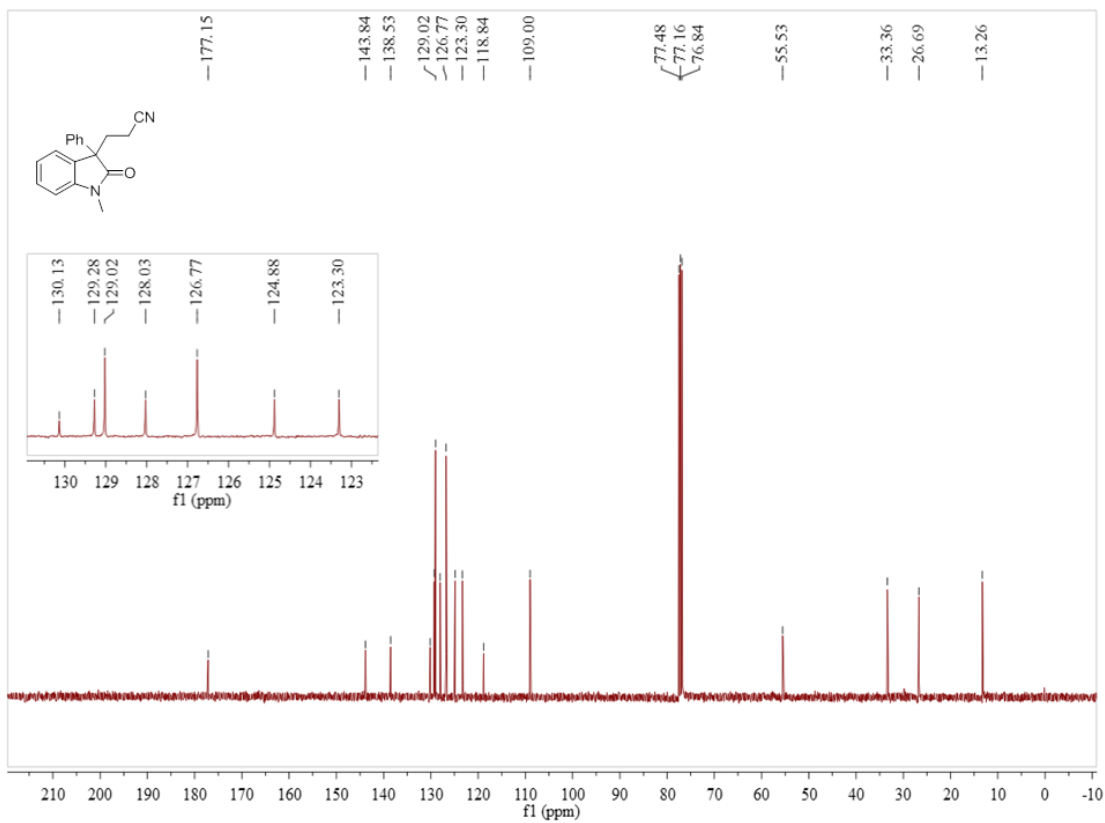

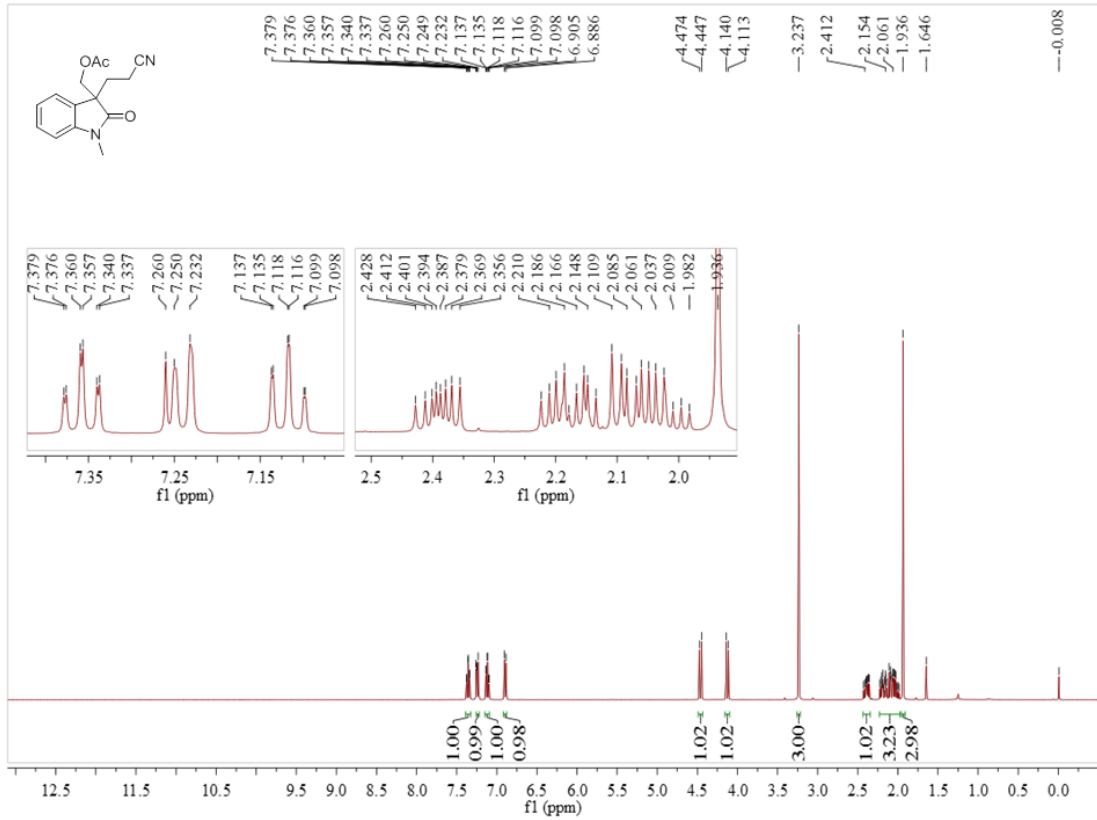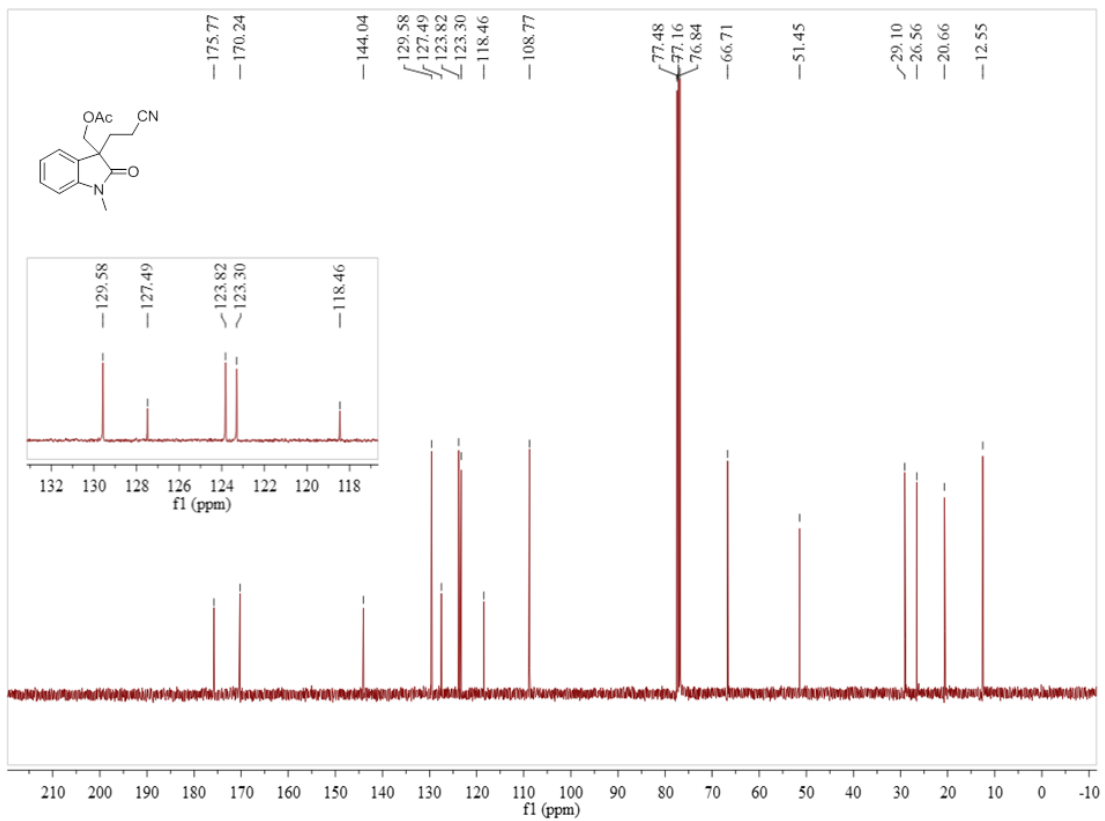

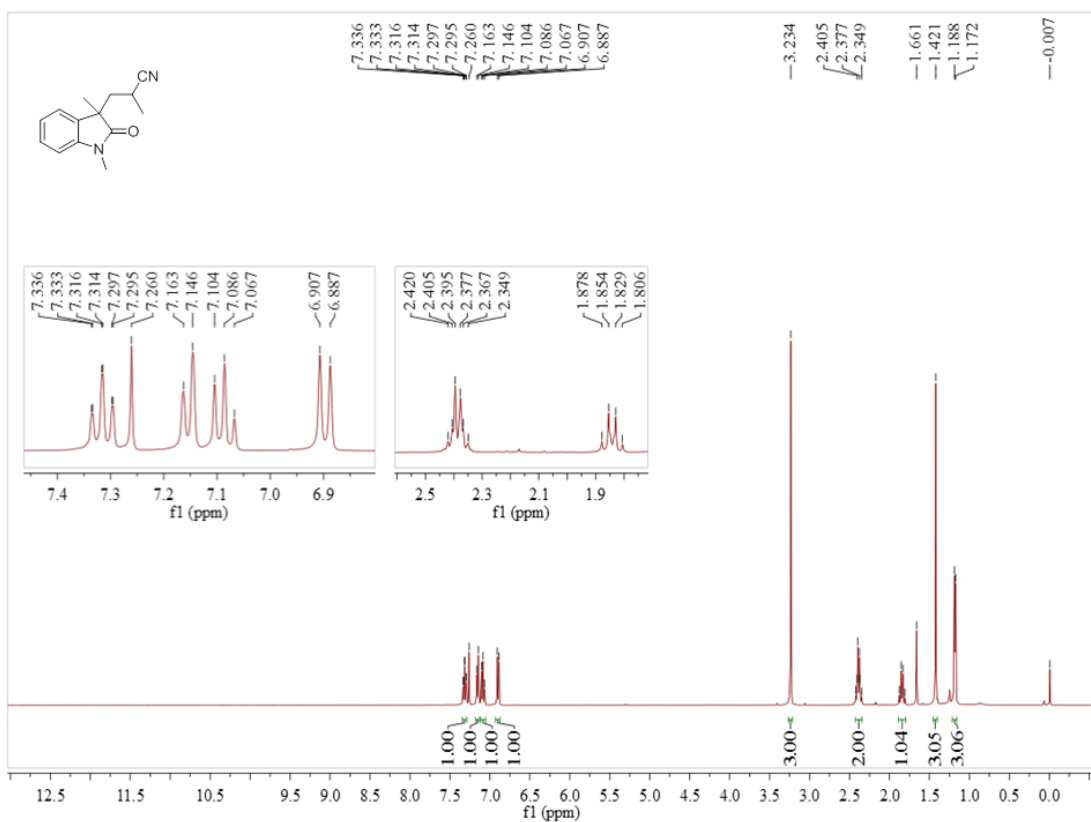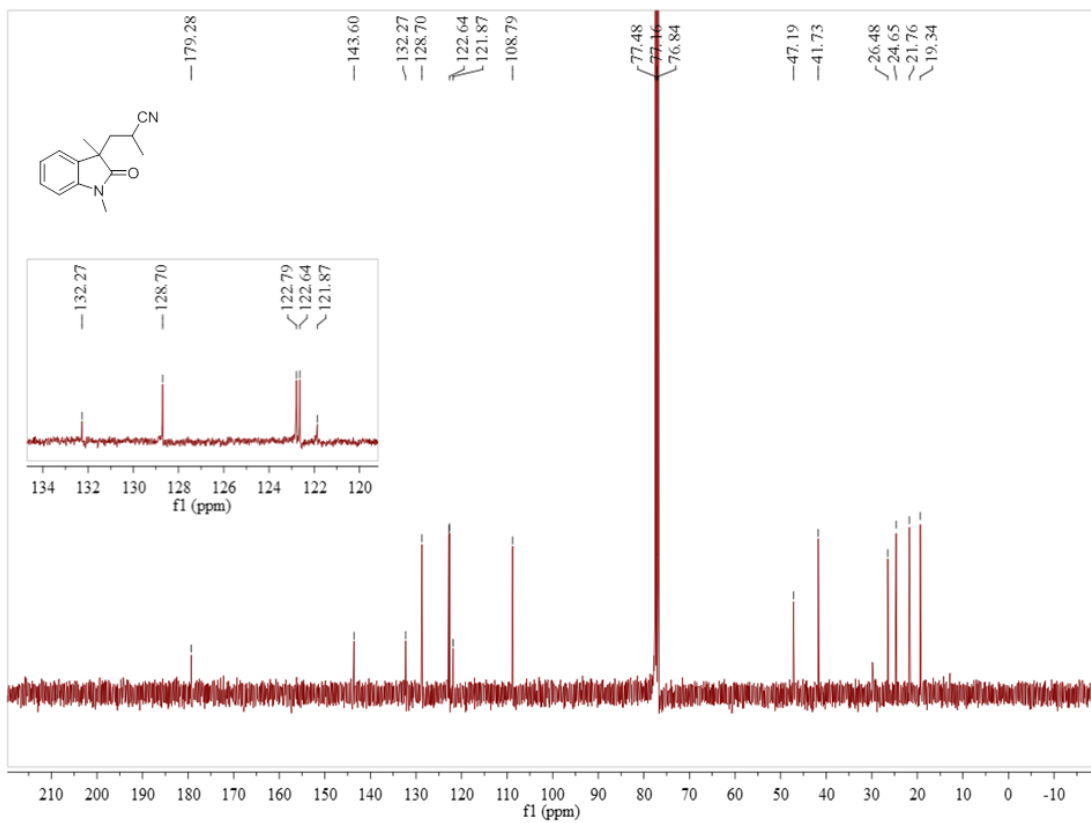

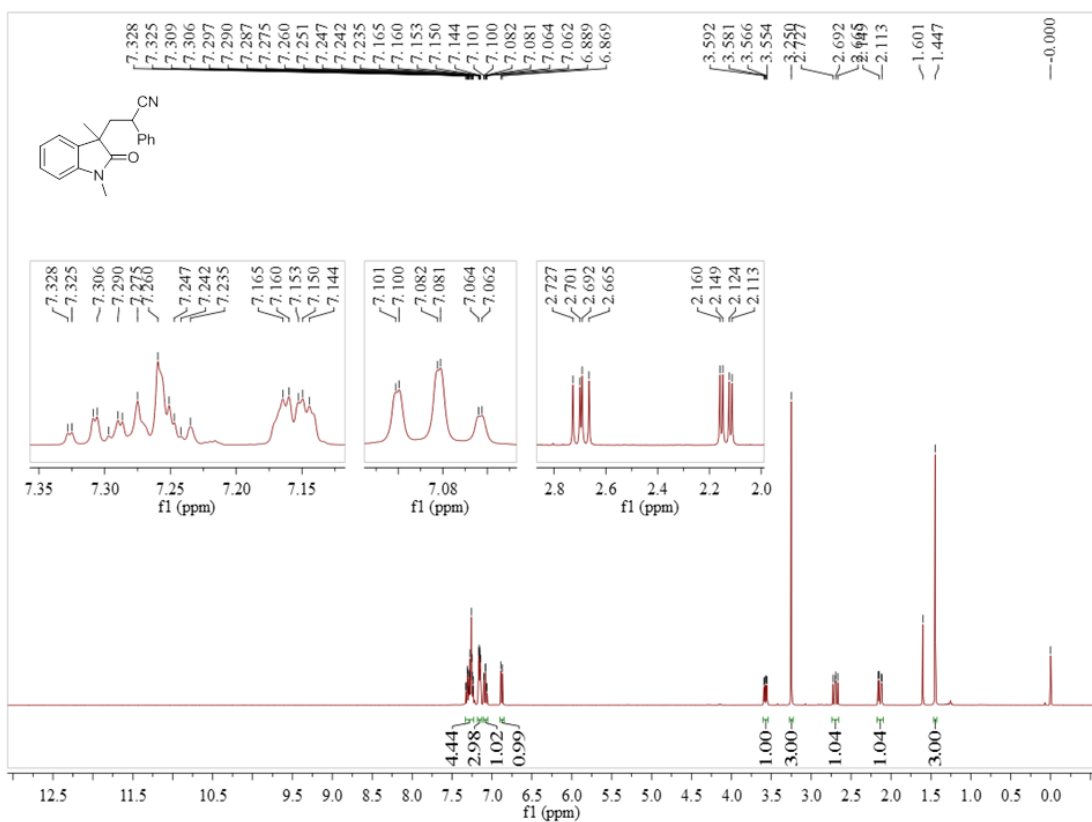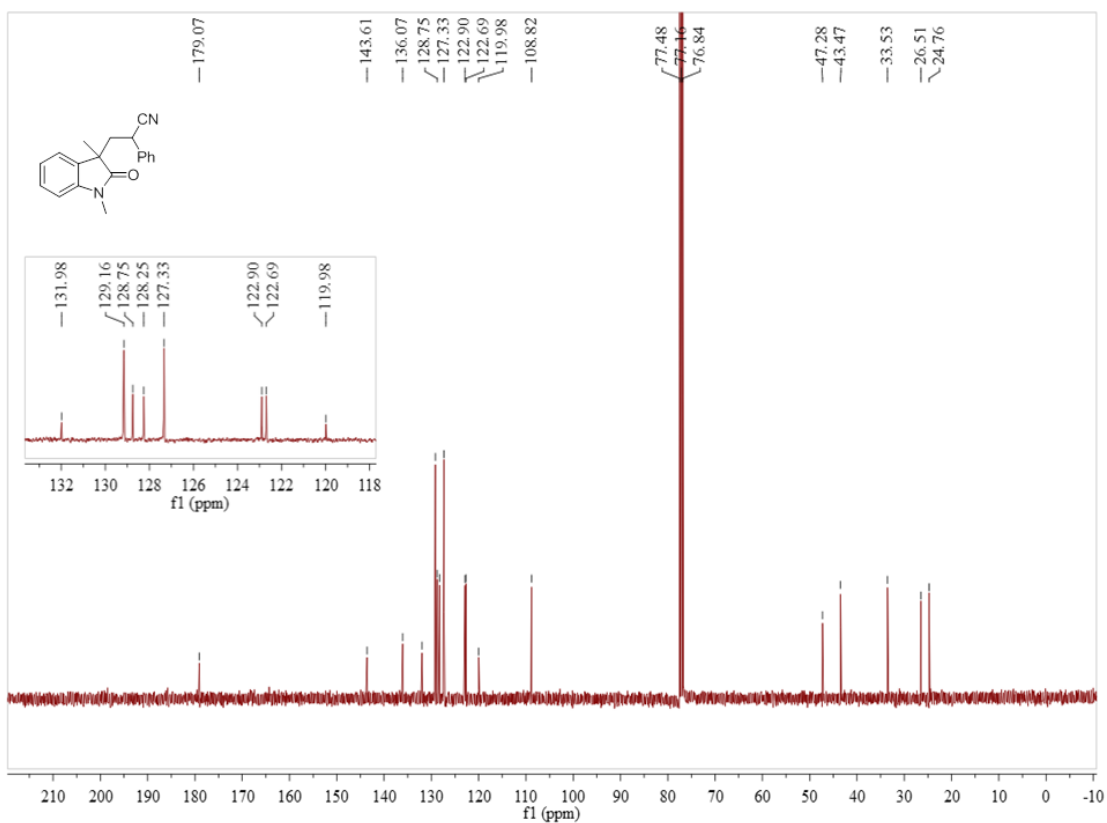

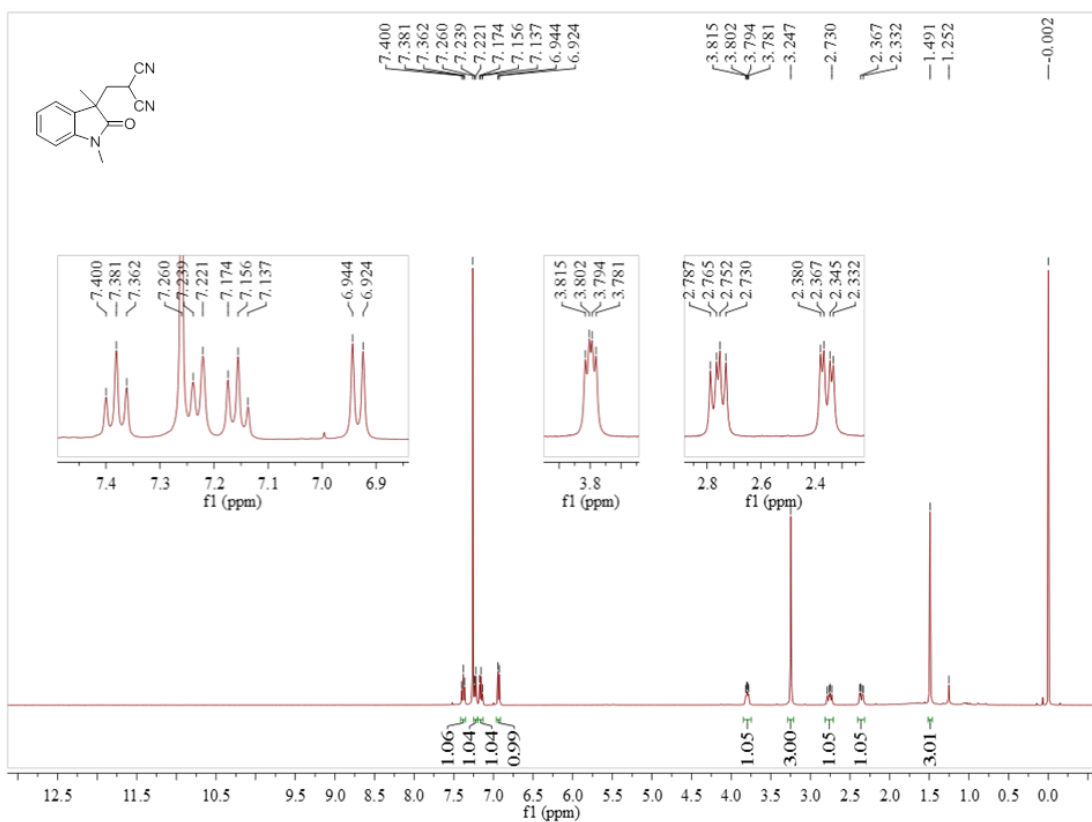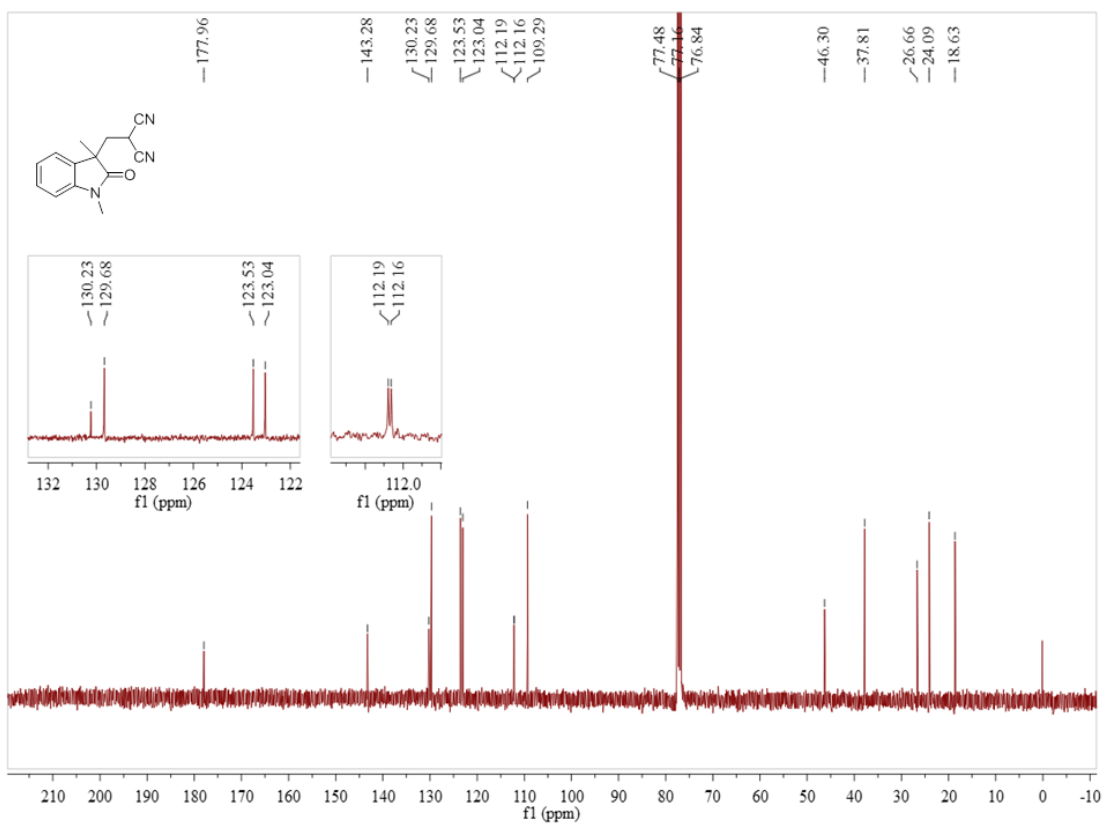



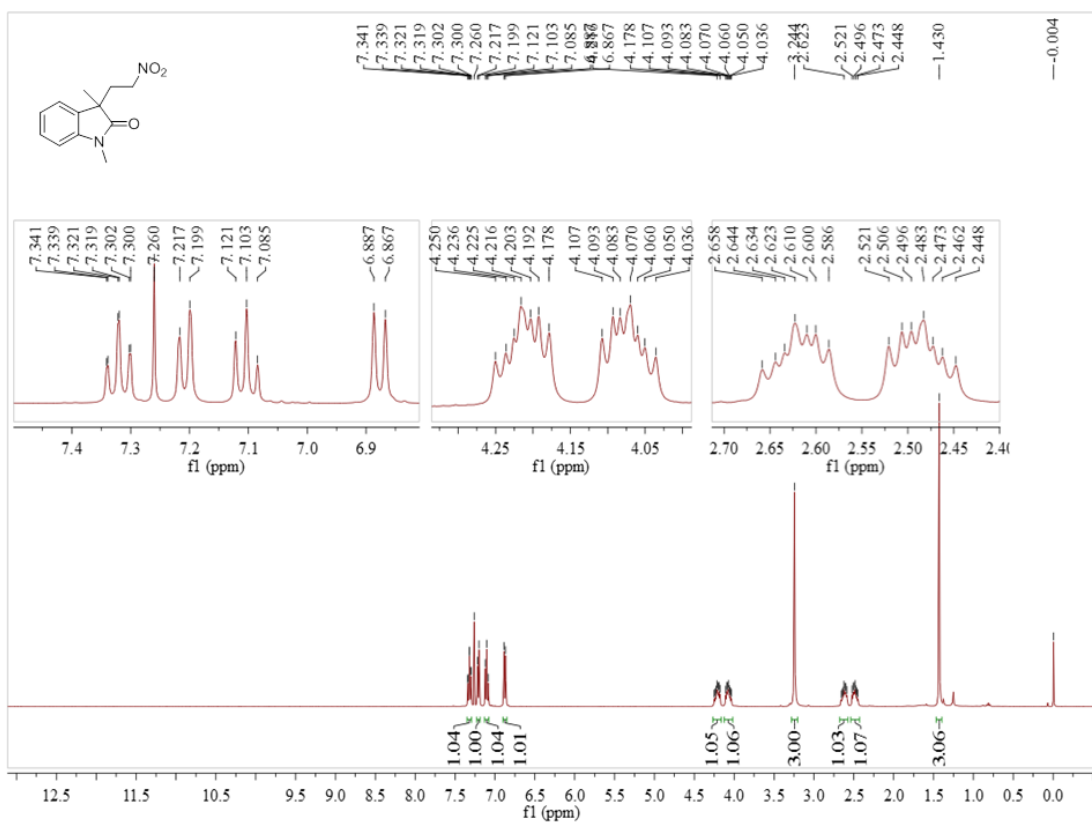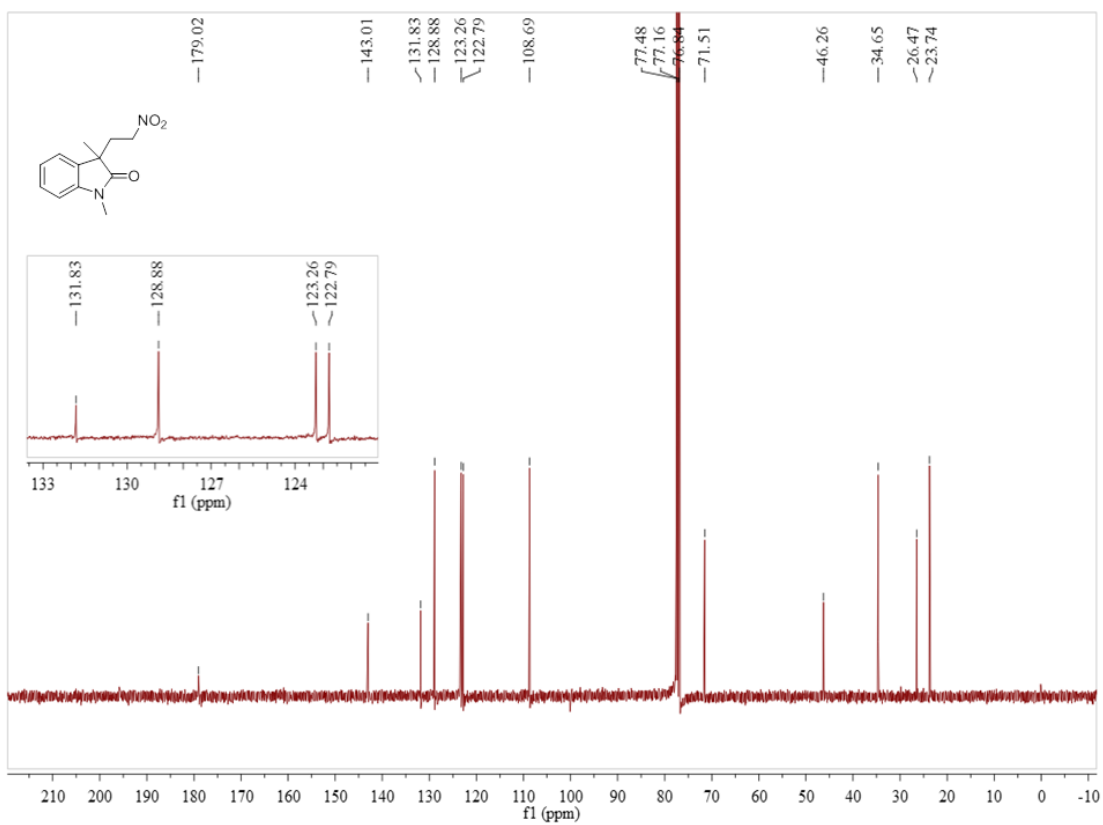

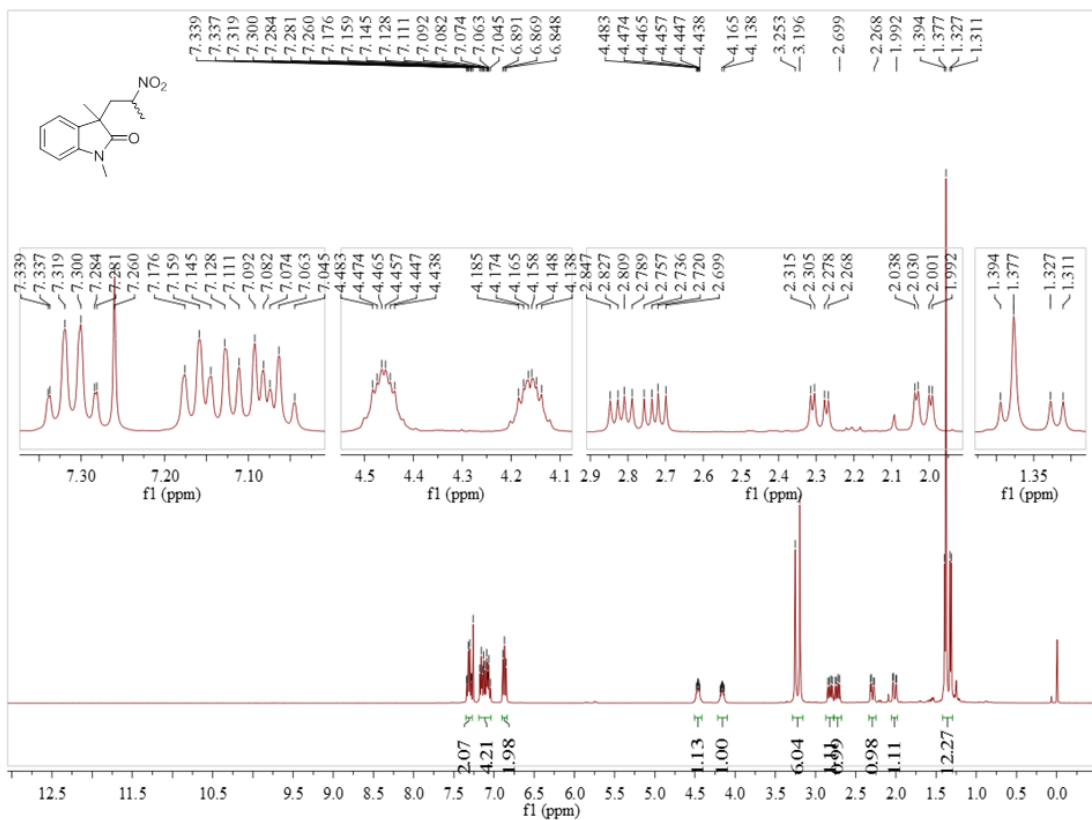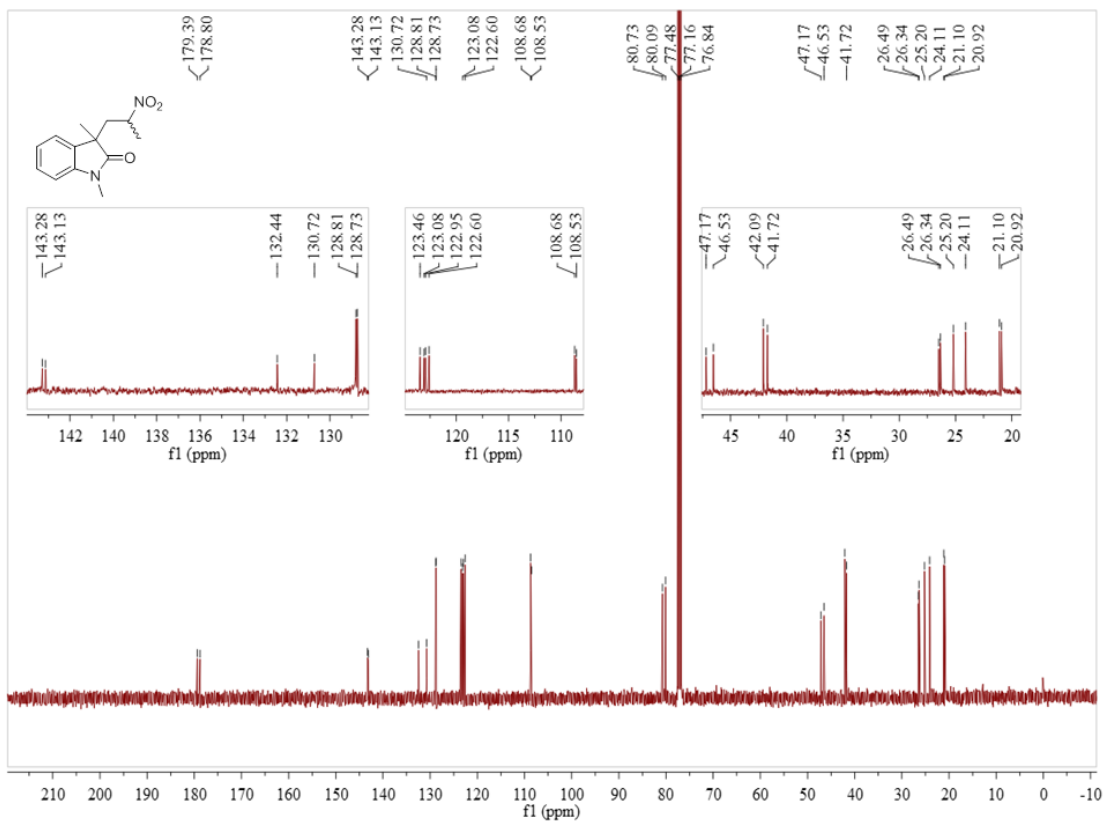

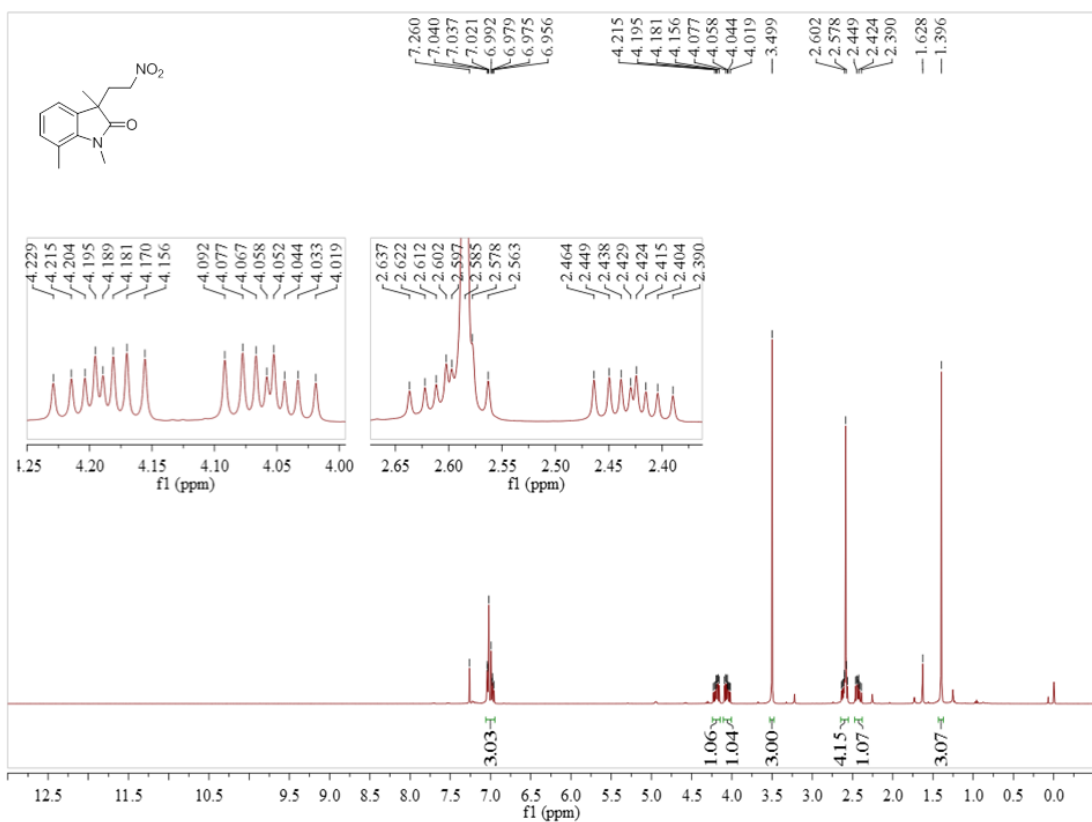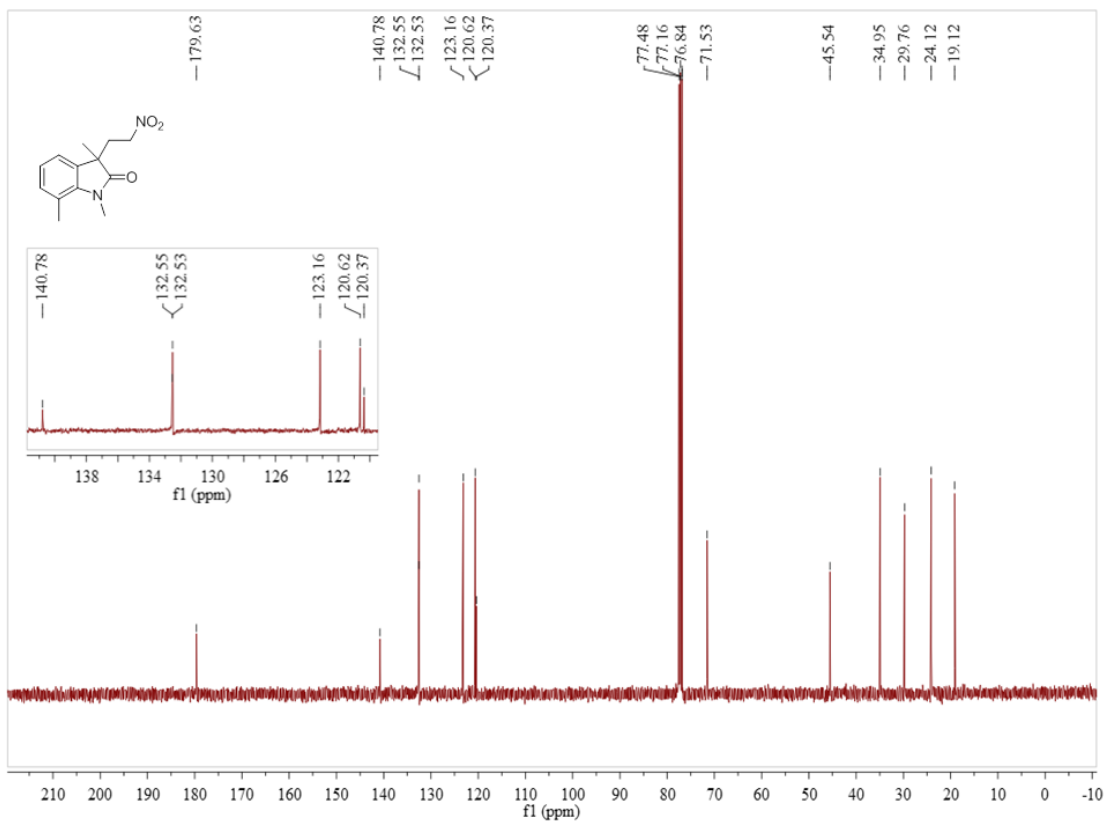

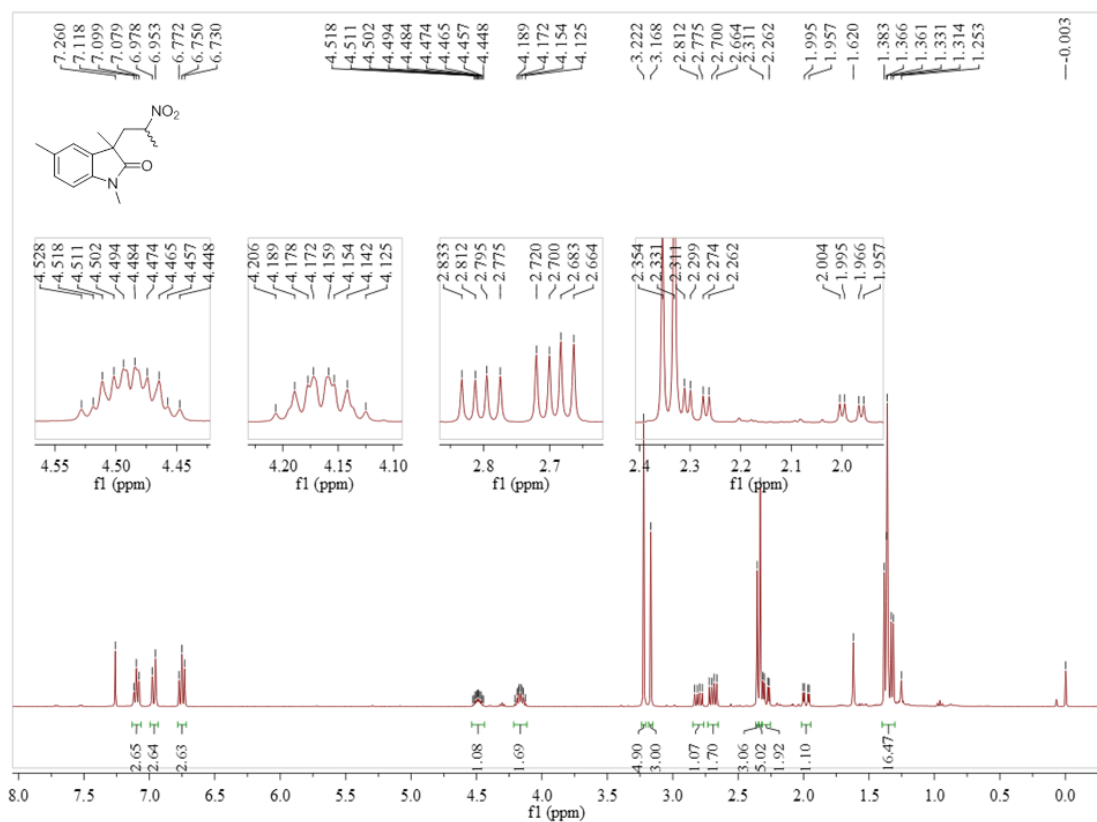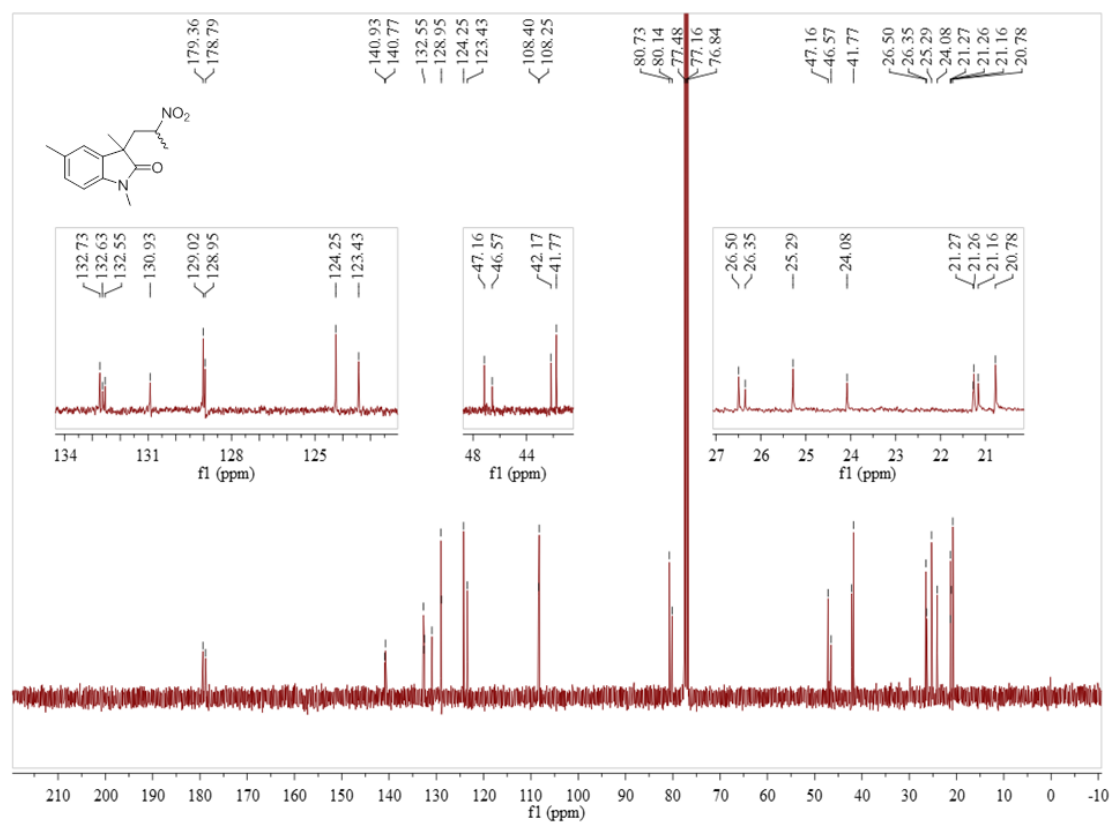

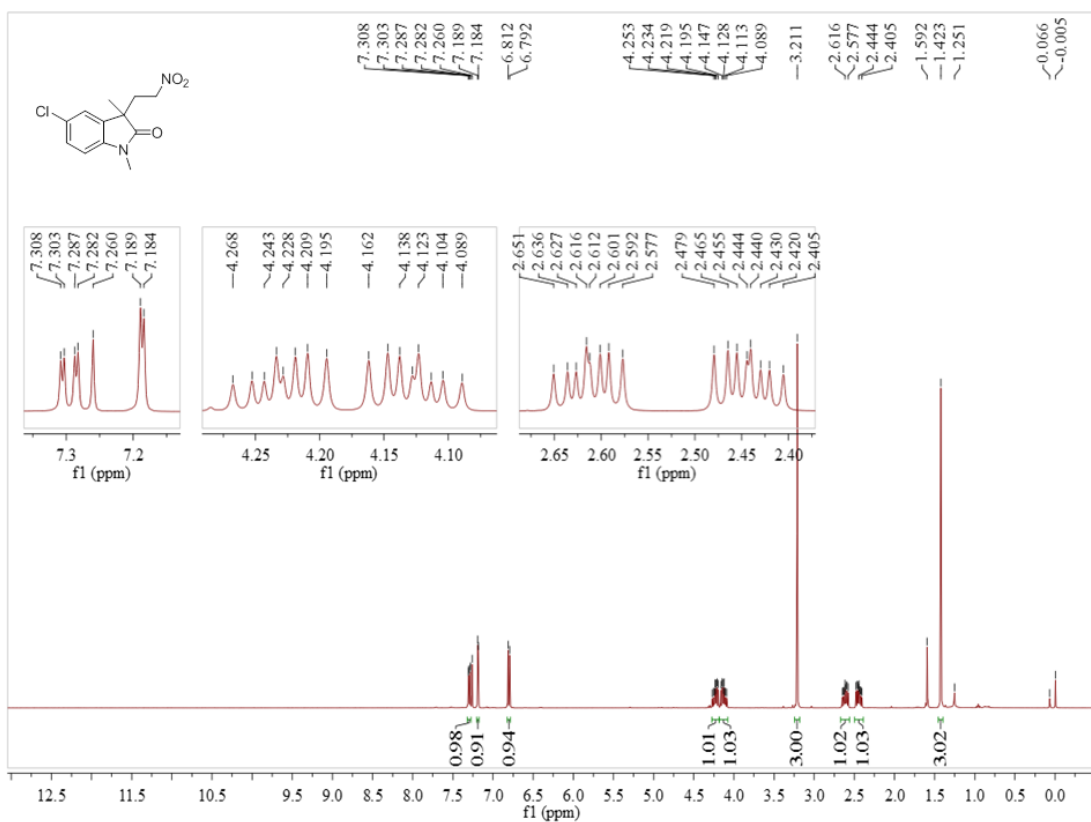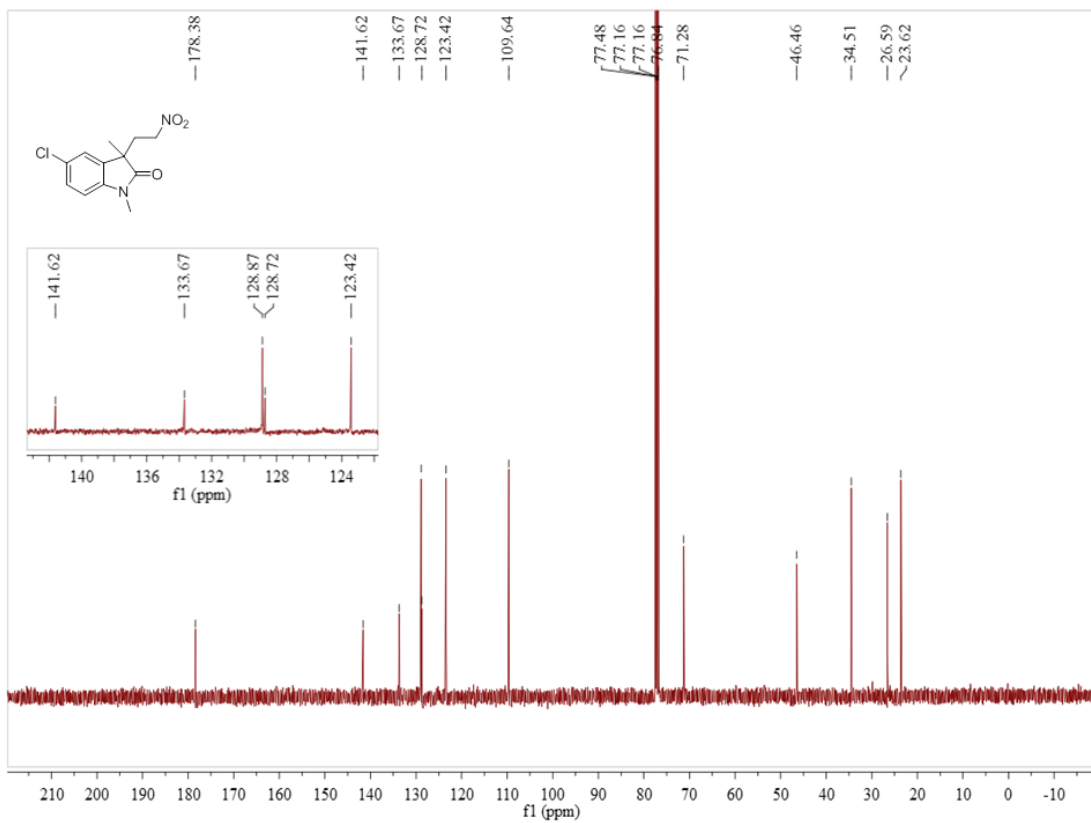

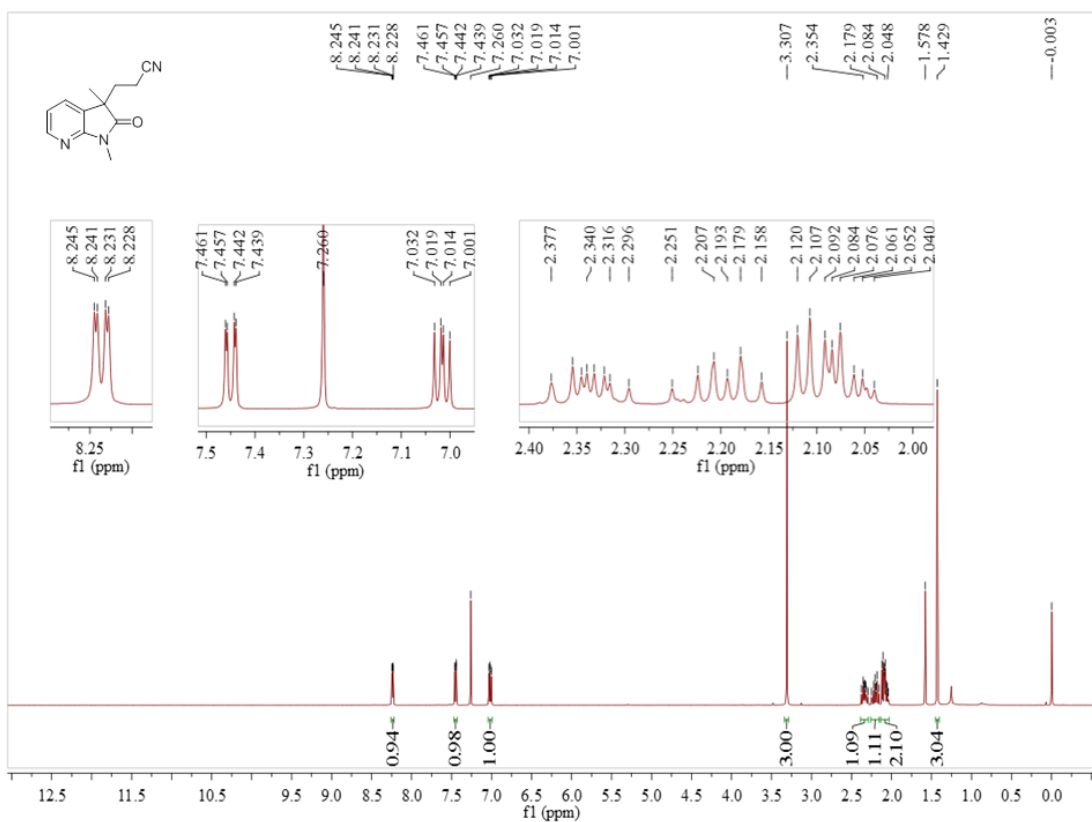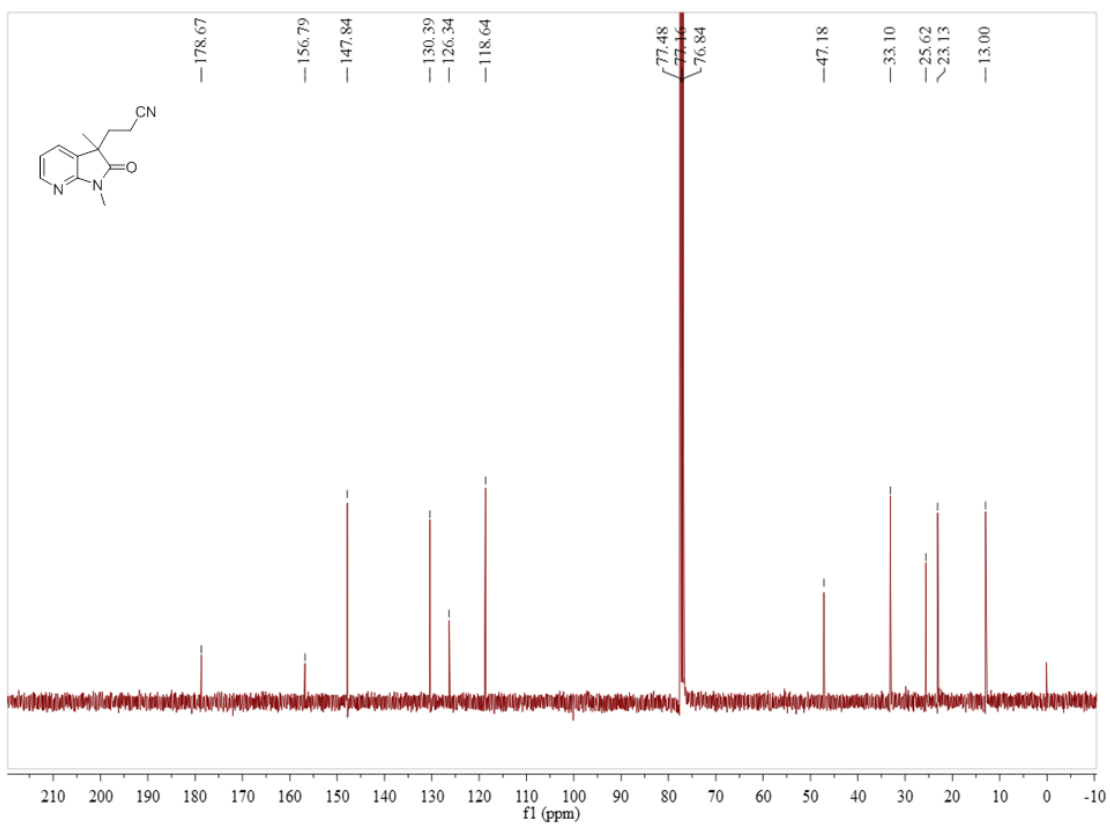

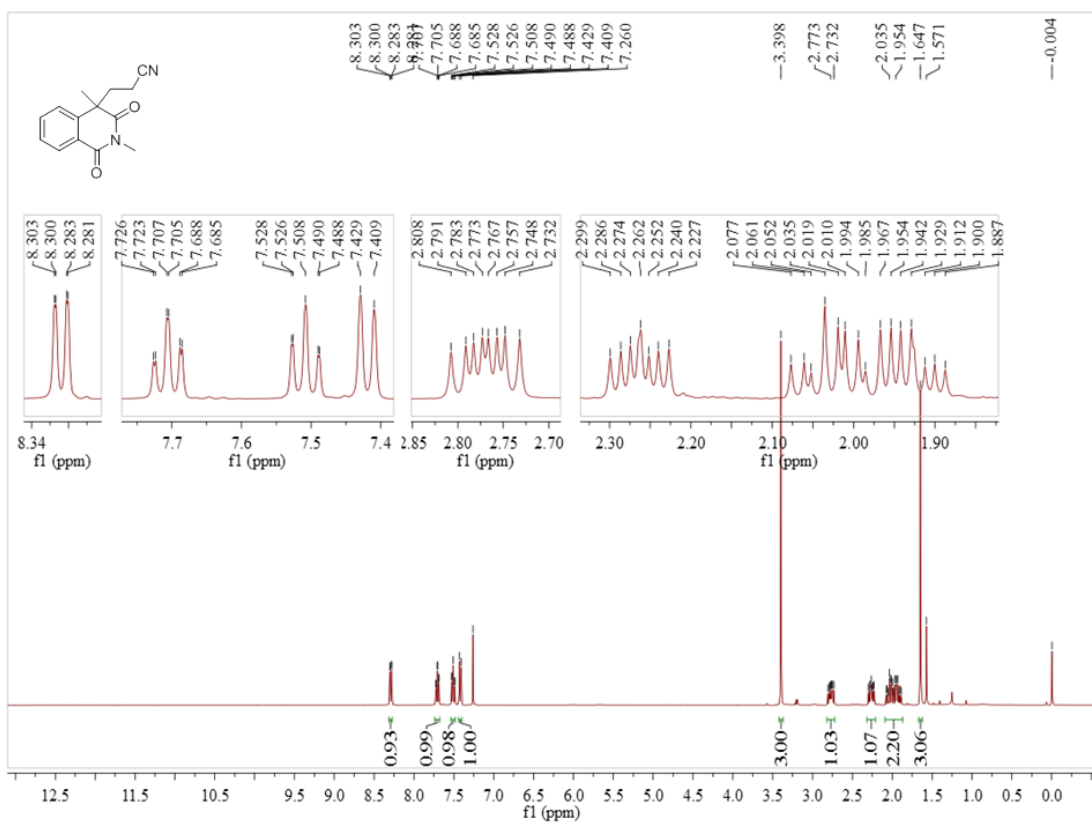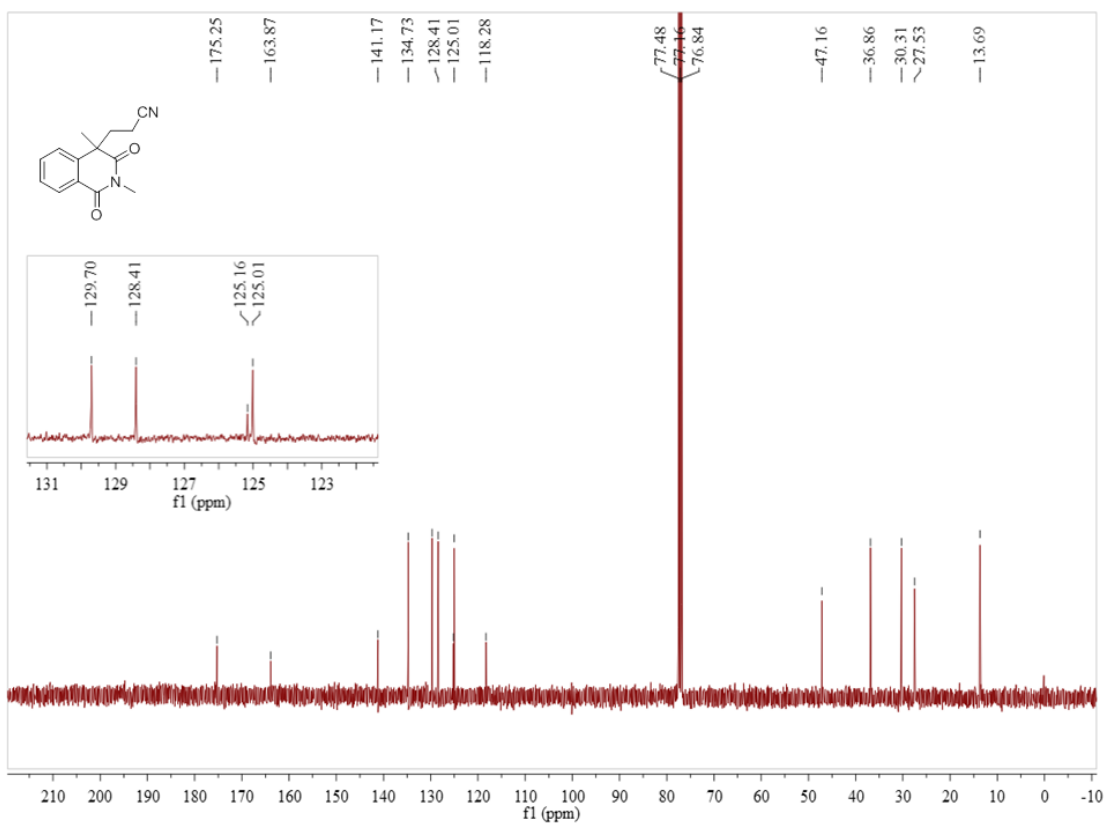

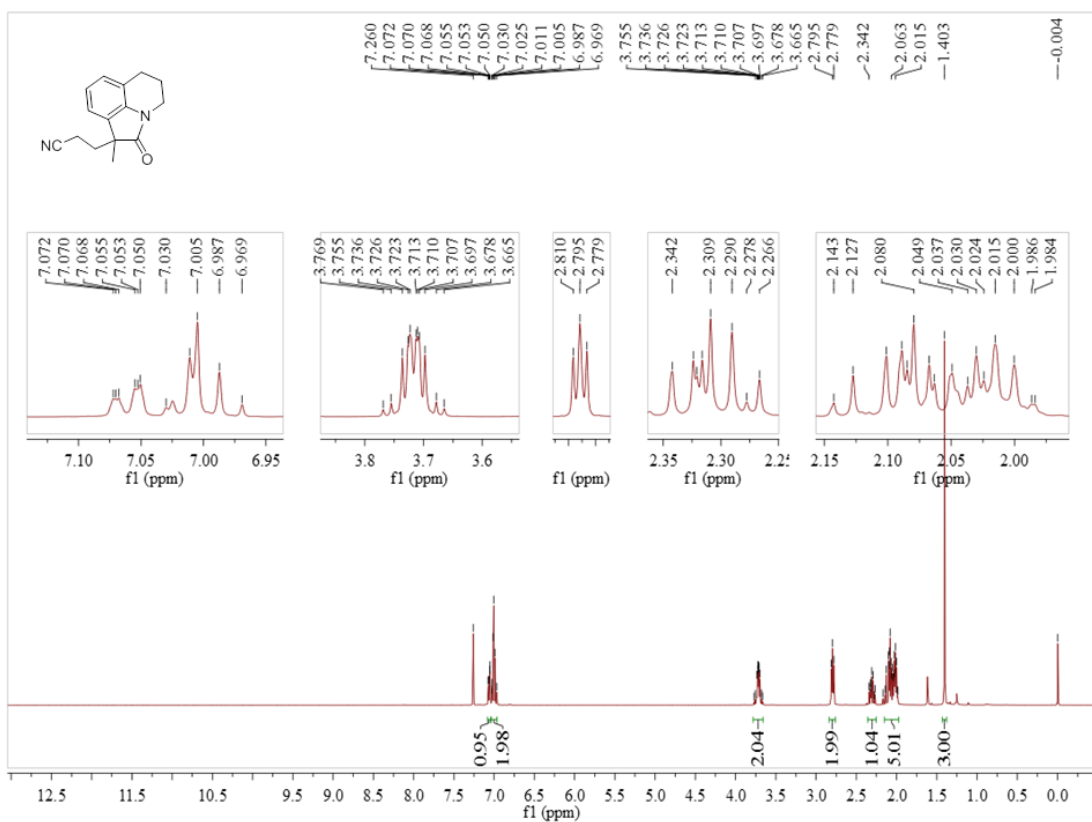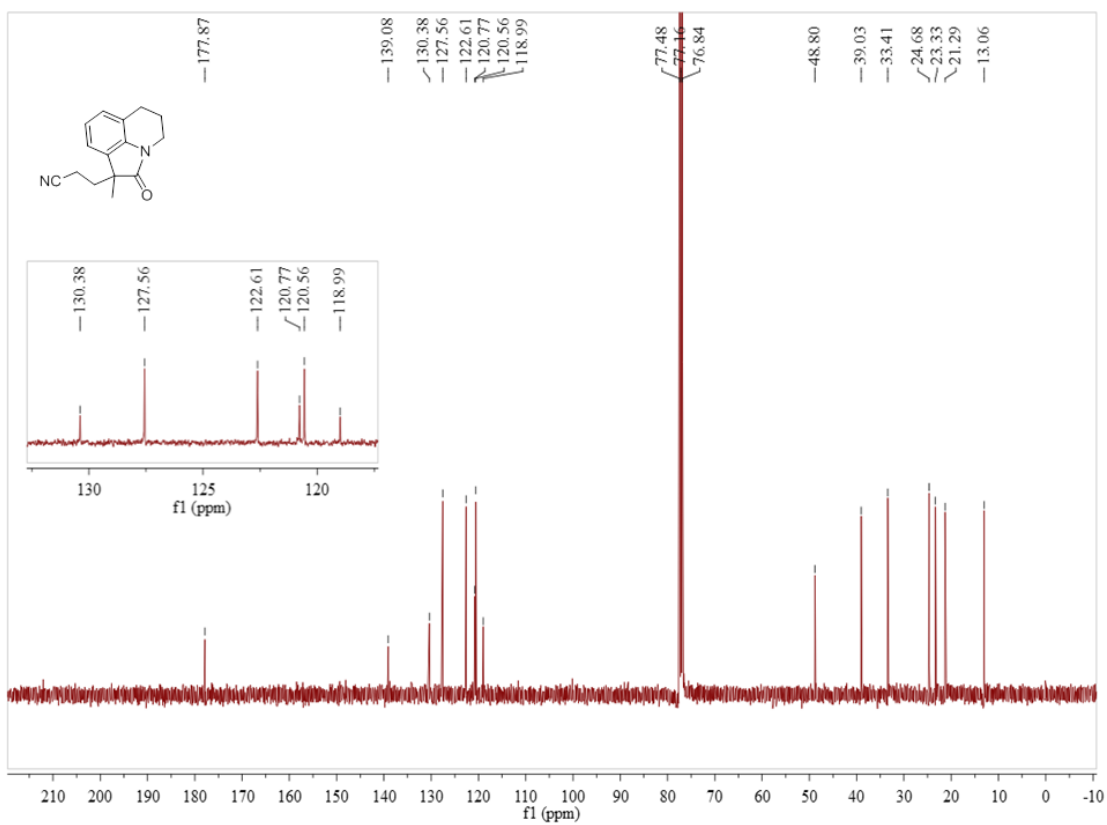

Supplement: c4cc07667b1.pdf [file c4cc07667b1.pdf]
